# Supplementary material for: Cohort profile: A Québec-based plasma donor biobank to study COVID-19 immunity (PlasCoV)
Source: PubMed Central journal article supplement — BMJ Open. 2023 Feb 23;13(2):e068803. doi: 10.1136/bmjopen-2022-068803 (PMC9950588; doi:10.1136/bmjopen-2022-068803), 2023-02-23
Supplement: bmjopen-2022-068803.draft_revisions.pdf [file bmjopen-2022-068803.draft_revisions.pdf]

# BMJ Open

BMJ Open is committed to open peer review. As part of this commitment we make the peer review history of every article we publish publicly available.

When an article is published we post the peer reviewers' comments and the authors' responses online. We also post the versions of the paper that were used during peer review. These are the versions that the peer review comments apply to.

The versions of the paper that follow are the versions that were submitted during the peer review process. They are not the versions of record or the final published versions. They should not be cited or distributed as the published version of this manuscript.

BMJ Open is an open access journal and the full, final, typeset and author-corrected version of record of the manuscript is available on our site with no access controls, subscription charges or pay-per-view fees (<http://bmjopen.bmj.com>).

If you have any questions on BMJ Open's open peer review process please email [info.bmjopen@bmj.com](mailto:info.bmjopen@bmj.com)

# BMJ Open

## Cohort profile: A Québec-based plasma donor biobank to study COVID-19 immunity (PlasCoV)

|                               |                                                                                                                                                                                                                                                          |
|-------------------------------|----------------------------------------------------------------------------------------------------------------------------------------------------------------------------------------------------------------------------------------------------------|
| Journal:                      | <i>BMJ Open</i>                                                                                                                                                                                                                                          |
| Manuscript ID                 | bmjopen-2022-068803                                                                                                                                                                                                                                      |
| Article Type:                 | Cohort profile                                                                                                                                                                                                                                           |
| Date Submitted by the Author: | 30-Sep-2022                                                                                                                                                                                                                                              |
| Complete List of Authors:     | Germain, Marc; Héma-Québec<br>Lewin, Antoine; Héma-Québec,<br>Bazin, Renée; Héma-Québec<br>Dieudé, Mélanie; Héma-Québec<br>Perreault, Josée; Héma-Québec<br>Boivin, Amélie; Héma-Québec<br>Grégoire, Yves; Héma-Québec<br>Renaud, Christian; Héma-Québec |
| Keywords:                     | Blood bank & transfusion medicine < HAEMATOLOGY, Public health < INFECTIOUS DISEASES, COVID-19                                                                                                                                                           |
|                               |                                                                                                                                                                                                                                                          |

SCHOLARONE™  
Manuscripts

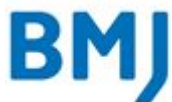

I, the Submitting Author has the right to grant and does grant on behalf of all authors of the Work (as defined in the below author licence), an exclusive licence and/or a non-exclusive licence for contributions from authors who are: i) UK Crown employees; ii) where BMJ has agreed a CC-BY licence shall apply, and/or iii) in accordance with the terms applicable for US Federal Government officers or employees acting as part of their official duties; on a worldwide, perpetual, irrevocable, royalty-free basis to BMJ Publishing Group Ltd ("BMJ") its licensees and where the relevant Journal is co-owned by BMJ to the co-owners of the Journal, to publish the Work in this journal and any other BMJ products and to exploit all rights, as set out in our [licence](#).

The Submitting Author accepts and understands that any supply made under these terms is made by BMJ to the Submitting Author unless you are acting as an employee on behalf of your employer or a postgraduate student of an affiliated institution which is paying any applicable article publishing charge ("APC") for Open Access articles. Where the Submitting Author wishes to make the Work available on an Open Access basis (and intends to pay the relevant APC), the terms of reuse of such Open Access shall be governed by a Creative Commons licence – details of these licences and which [Creative Commons](#) licence will apply to this Work are set out in our licence referred to above.

Other than as permitted in any relevant BMJ Author's Self Archiving Policies, I confirm this Work has not been accepted for publication elsewhere, is not being considered for publication elsewhere and does not duplicate material already published. I confirm all authors consent to publication of this Work and authorise the granting of this licence.

1  
2  
3 **Cohort profile: A Québec-based plasma donor biobank to study COVID-19**  
4  
5 **immunity (PlasCoV)**  
6  
7

8 Marc Germain<sup>1\*</sup>, Antoine Lewin<sup>1</sup>, Renée Bazin<sup>1</sup>, Mélanie Dieudé<sup>1</sup>, Josée Perreault<sup>1</sup>,  
9  
10 Amélie Boivin<sup>1</sup>, Yves Grégoire<sup>1</sup>, Christian Renaud<sup>1</sup>  
11  
12

13  
14 <sup>1</sup> Medical Affairs and Innovation, Héma-Québec, Montréal and Québec, Canada  
15  
16

17  
18  
19  
20  
21 **Corresponding author:**  
22

23  
24 Dr. Marc Germain, MD, PhD, FRCP(C)  
25

26 Vice-President, Medical Affairs and Innovation  
27

28 Héma-Québec  
29

30 1070 avenue des Sciences-de-la-Vie, Québec, QC G1V 5C3, Canada  
31

32  
33 Phone: 1-418 780-4362  
34

35  
36 E-mail: [marc.germain@hema-quebec.qc.ca](mailto:marc.germain@hema-quebec.qc.ca)  
37  
38

39  
40 **Word count:** 2,297  
41

42 **References:** 29  
43

44 **Tables and Figures:** 4  
45  
46  
47  
48  
49  
50  
51  
52  
53  
54  
55  
56  
57  
58  
59  
60

## Abstract

### *Purpose*

Long-term humoral immunity to COVID-19 is not well understood owing to the continuous emergence of new variants of concern, the evolving vaccine- and infection-induced immunity, and the limited follow-up of previous studies. As the blood service in Québec (Canada), we established in April 2021 a COVID-19-focused biobank.

### *Participants*

As of January 2022, included 86,229 plasma samples from 15,502 regular donors (age range=18-84 years, female %=49.7%), for an average of 5.6 donations per donor. Nearly two thirds (65.6%) of biobank donors made at least 2 donations, with many donors having provided samples pre- and post-vaccination (3061 [19.75%]) or pre- and post-infection (131 [0.85%]), thus allowing longitudinal studies on vaccine- and infection-induced immunity.

### *Findings to date*

Comparative analysis of the immune response after the first and second dose of the BNT162b2 COVID-19 vaccine among SARS-CoV-2 naïve and previously infected individuals revealed that a single vaccine dose administered to previously infected individuals yields a maximal immune response. In contrast, SARS-CoV-2 naïve individuals required two vaccine doses to produce a maximal immune response. Furthermore, the results of a four-phase seroprevalence study indicate that the anti-N

1  
2  
3 antibody response wanes quite rapidly, so that up to one third of previously infected donors  
4  
5 were seronegative for anti-N.  
6  
7

### 8 ***Future plans***

9  
10  
11 This plasma biobank from frequent and motivated donors, and the longitudinal nature of  
12  
13 the biobank, will provide valuable insights into the anti-SARS-CoV-2 immune response  
14  
15 and its persistence in time, and the effect of vaccination and of viral variants on the  
16  
17 specificity of the antiSARS-CoV-2 immune response.  
18  
19

### 20 **Strengths and Limitations**

21  
22 The herein described biobank has several strengths. To the best of our knowledge, this  
23  
24 would be the largest biobank of plasma samples dedicated to COVID-19 research, with  
25  
26 >80,000 samples from >15,000 donors and new samples continually being added until at  
27  
28 least December 2022. Furthermore, the large subset of donors with  $\geq 2$  samples (65.6%) –  
29  
30 along with the high frequency of donations in this subset (i.e., median: once every 29.0  
31  
32 days) – enables the conduct of longitudinal analyses on COVID-19 immunity. Another  
33  
34 strength is that donors provided a broad consent, which allows researchers to recontact  
35  
36 them for other projects (e.g., supplemental questionnaire). Lastly, the cost of establishing  
37  
38 the biobank was minimized since the infrastructure and personnel required for sample  
39  
40 collection were already in place at our blood collection sites. Given these strengths, our  
41  
42 biobank may serve as a model for other blood operators and government partners who  
43  
44 would be interested in reproducing our initiative elsewhere.  
45  
46  
47  
48  
49  
50

51  
52  
53 Certain limitations should nonetheless be considered when using our biobank samples.

54  
55 First, only plasma samples are available, such that the biobank cannot be used to study cell-  
56  
57  
58  
59  
60

1  
2  
3 based immunity. Researchers interested in studying cell-based immunity may want to  
4 contact BCQ19, which routinely collects peripheral blood mononuclear cells.[1] Second,  
5  
6 despite the large sample, the plasma donor population is not fully representative of the  
7  
8 overall Québec population, as expected since plasma donors are typically more  
9  
10 representative of the healthy adult population. All exclusion criteria for plasma donations  
11  
12 were also exclusion criteria for the biobank including immunodeficiencies, active  
13  
14 infection, recent cancer among other chronic diseases. Third, the database associated with  
15  
16 our biobank does not include information on disease severity, such as hospitalization or  
17  
18 intensive care unit admission. Fourth, the database does not include information on  
19  
20 socioeconomic status, such as income and education. However, the six-digit zip code can  
21  
22 be used to generate a proxy index for socioeconomic status.  
23  
24  
25  
26  
27  
28  
29  
30  
31  
32  
33  
34  
35  
36  
37  
38  
39  
40  
41  
42  
43  
44  
45  
46  
47  
48  
49  
50  
51  
52  
53  
54  
55  
56  
57  
58  
59  
60

## Introduction

Despite remarkable progress, our understanding of the long-term, humoral immunity to COVID-19 is incomplete owing to a number of challenges. The emergence of new variants of concern, such as Omicron, continuously challenges prior assumptions and data on the effectiveness and persistence of COVID-19 immunity.[2,3] Furthermore, amid mass vaccination, disentangling infection and vaccine-induced humoral response to SARS-CoV-2 has become increasingly difficult to inform public health authorities.[4–6] Notably, the vast majority of published serological studies used a cross-sectional design, and hence do not provide individual-level data on COVID-19 immunity.[7] The more limited number of longitudinal studies that have been conducted had follow-up periods <12 months[8–19] and lacked long-term funding commitment. Clearly, new initiatives are needed to overcome these barriers.

Historically, biobanks have spurred research efforts on novel or rare diseases[20] and would likely help address the aforementioned challenges for COVID-19 research. They do so using highly standardized, quality-controlled processes to analyze a large number of biological specimens which are made available to the research community. In addition, biobanks are subject to regulatory oversight to protect donors' rights. Virtually all biobanks collect a “broad” consent that allows for samples to be used for multiple research purposes.[21] For researchers, this practice (while controversial)[22] alleviates the burden associated with seeking consent.

Existing COVID-19-focused biobanks are suboptimal to longitudinally study COVID-19 immunity. The *Biobanque québécoise de la COVID-19* (BCQ19) is a biobanking initiative



1  
2  
3 in Québec (Canada) that includes blood samples from individuals with a negative (controls)  
4 or positive COVID-19 PCR test result, with samples collected at several fixed time points  
5 for up to 24 months post-diagnosis (for non-hospitalized individuals) or post-  
6 hospitalization (for hospitalized individuals).[1] However, BCQ19 is limited in terms of  
7 sample size and population representativeness. Furthermore, the unavailability of samples  
8 prior to diagnosis or hospitalization hinders the study of the early immune response to  
9 COVID-19.  
10  
11  
12  
13  
14  
15  
16  
17  
18  
19

20 Blood services such as our institution (Héma-Québec – the only blood service operating in  
21 Québec) are ideally positioned to establish a biobank that would complement BCQ19 or  
22 other COVID-19-focused biobanks and better address researchers' needs. Indeed, blood  
23 services routinely collect biological specimens from donors in the general population,  
24 thereby substantially alleviating the high cost normally associated with the establishment  
25 of a biobank. Blood services have been key partners in conducting COVID-19 research  
26 since the beginning of the pandemic;[23] involving them in biobanking efforts is therefore  
27 a sound approach to fuel additional research on COVID-19 immunity.  
28  
29  
30  
31  
32  
33  
34  
35  
36  
37  
38

39 Here, we report on the establishment of a new biobank dedicated to COVID-19 research to  
40 inform public health in the province of Québec (Canada). The biobank consists of regular  
41 plasma donations collected throughout Québec, hence the name 'PlasCoV'. Because  
42 plasma donors can donate every 6 days at our institution, the biobank includes a large  
43 number of repeat donors for whom longitudinal analyses are feasible.  
44  
45  
46  
47  
48  
49  
50  
51  
52  
53  
54  
55  
56  
57  
58  
59  
60

## Cohort Description

The project was initiated on February 23, 2021. A pilot phase was launched in March 2021, and the project was expanded to all of our fixed collection centers in April 2021. At that time, the majority of the Québec general population was unvaccinated,[24] which enabled us to collect samples both pre- and post-vaccination obtained from many donors.

Ten fixed blood centers –all located in large or medium size ( $\geq 100,000$  population) areas were designated to collect biobank-dedicated samples (**Table 1**). The resulting donor cohort is therefore broadly representative of plasma donors living in urban and suburban areas throughout Québec.

**Table 1. Number of samples collected by each blood center**

| Center name                    | Metropolitan area | Health region (#-name)          | Samples collected, N (%) <sup>1</sup> |
|--------------------------------|-------------------|---------------------------------|---------------------------------------|
| Globule - Centre Laval         | Montréal          | 13-Laval                        | 3909 (4.1)                            |
| Globule - Kirkland             | Montréal          | 06-Montréal                     | 2574 (2.7)                            |
| Globule - Quartier Dix30       | Montréal          | 16-Montérégie                   | 5134 (5.4)                            |
| Globule - Place Versailles     | Montréal          | 06-Montréal                     | 3205 (3.3)                            |
| Globule - Quartier Lebourgneuf | Québec city       | 03-Capitale Nationale           | 11260 (11.7)                          |
| Globule - Sainte-Foy           | Québec city       | 03-Capitale Nationale           | 11391 (11.9)                          |
| Plasmavie - Gatineau           | Gatineau          | 08-Outaouais                    | 11878 (12.4)                          |
| Plasmavie - Saguenay           | Saguenay          | 02-Saguenay-Lac-St-Jean         | 17325 (18.1)                          |
| Plasmavie - Sherbrooke         | Sherbrooke        | 05-Estrie                       | 16669 (17.4)                          |
| Plasmavie - Trois-Rivières     | Trois-Rivières    | 04-Mauricie et Centre du Québec | 12627 (13.2)                          |

<sup>1</sup>As of 01/24/2022

The project is entirely funded by the COVID-19 Immunity Task Force (CITF), a government-funded working group dedicated to advancing knowledge and research on COVID-19 in Canada and to inform public health authorities. CITF has provided a long-term funding commitment (2 years) for this biobank project, which will enable the conduct of long-term studies on infection- and vaccine-induced immunity to COVID-19.

1  
2  
3 The biobank includes samples from a population-based cohort of healthy voluntary, non-  
4 remunerated donors of plasma for fractionation who consented that their samples be used  
5 for research purposes. As of 01/24/2022, 15,502 out of 17,070 (90.8%) donors consented  
6 to have a small aliquot of their donations used for research on COVID-19. No donor  
7 recruitment campaign was specifically undertaken for this research initiative.  
8  
9

10  
11 Donor characteristics were assessed as of 01/24/2022. Among consenting donors, the most  
12 common age group was 18-29 years (28.4%; **Table 2**). The six health regions where donors  
13 most often lived were Capitale-Nationale (18.1%), Estrie (14.7%), Saguenay-Lac-Saint-  
14 Jean (14.4%), Mauricie et Centre-du-Québec (11.4%), Outaouais (11.2%), and Montréal  
15 (9.8%). The cohort predominantly included donors who self-identified as white (93.6%).  
16 Relative to non-consenting donors, consenting donors tended to be younger (e.g., 18-29  
17 years: 28.4% vs. 24.1% for the biobank and non-consenting donors respectively); and  
18 included slightly more female donors (i.e., 49.7% vs. 46.3%) and more residents of urban  
19 areas (e.g., Montreal-Laval region: 12.1% vs. 8.1%). Relative to the Québec general  
20 population, consenting donors had a similar age and sex distribution, but the densely  
21 populated region of Montreal-Laval was underrepresented (12.1% vs. 24.4%).  
22  
23  
24  
25  
26  
27  
28  
29  
30  
31  
32  
33  
34  
35  
36  
37  
38  
39  
40

41 The cohort includes 3061 donors with samples collected pre- and post-vaccination, thereby  
42 enabling the study of vaccine-induced immunity in a real-world population of vaccine-  
43 naïve individuals. The cohort also includes 10,551 donors with samples collected only  
44 post-vaccination. Finally, the cohort include 1326 donors with sample collected only pre-  
45 vaccination and 564 donors with no vaccination history or missing information. Another  
46 (more limited) subset consists of 131 donors with available data before and after a  
47 documented infection.  
48  
49  
50  
51  
52  
53  
54  
55  
56  
57  
58  
59  
60

1  
2  
3 The vast majority (i.e., 96.4%) of donors had received  $\geq 1$  vaccine dose, and 95.7% had  
4 received  $\geq 2$  doses; only 1.6% were unvaccinated. In Québec, the second vaccine dose was  
5  
6 delayed for up to 16 weeks to optimize population-level immunity amid concerns over  
7  
8 limited vaccine supply. As a result, a large proportion of plasma donors (14.6%) received  
9  
10 their second dose 85-112 days after their first dose, but some received it within the  $\square 3$   
11  
12 week gap recommended by the manufacturer (i.e., 1.9% within 4 weeks). This notable  
13  
14 feature of our biobank may be used to study the impact of vaccine dose intervals on the  
15  
16 immune response, as done by Tauzin et al.[25] (described in more details further down).  
17  
18  
19  
20  
21

22 The following vaccines have been administered in Québec: ChAdOx1-S, BNT162b2, and  
23  
24 mRNA-1273. Some individuals have received combinations of these vaccines, which was  
25  
26 allowed by public health authorities to help fast-track the vaccination campaign.  
27  
28  
29

30 As previously mentioned, a key feature of this biobank is the availability of multiple,  
31  
32 longitudinal plasma samples and data collected for a large proportion of the cohort. As of  
33  
34 01/24/2022, the biobank had collected 86,229 samples from 15,502 donors, for an average  
35  
36 of 5.6 donations per donor.  
37  
38  
39  
40  
41  
42  
43  
44  
45  
46  
47  
48  
49  
50  
51  
52  
53  
54  
55  
56  
57  
58  
59  
60

**Table 2. Donor characteristics (as of 01/24/2022)**

|                                                            | Consenting donors<br>(N=15,502) |        | Non-consenting<br>donors<br>(N=1568) |                      | General, adult<br>population <sup>1</sup> |
|------------------------------------------------------------|---------------------------------|--------|--------------------------------------|----------------------|-------------------------------------------|
|                                                            | N                               | (%)    | N                                    | (%)                  | (%)                                       |
| <b>Sex<sup>2</sup></b>                                     |                                 |        |                                      |                      |                                           |
| Female                                                     | 7709                            | (49.7) | 831                                  | (46.3)               | (50.2)                                    |
| <b>Age (years)<sup>2,3</sup></b>                           |                                 |        |                                      |                      |                                           |
| 18-29                                                      | 4399                            | (28.4) | 433                                  | (24.1)               | (17.1)                                    |
| 30-39                                                      | 2556                            | (16.5) | 269                                  | (15)                 | (16.0)                                    |
| 40-49                                                      | 2287                            | (14.8) | 251                                  | (14)                 | (16.1)                                    |
| 50-59                                                      | 2440                            | (15.7) | 335                                  | (18.7)               | (16.1)                                    |
| 60-70                                                      | 3178                            | (20.5) | 408                                  | (22.7)               | (18.3)                                    |
| ≥71                                                        | 642                             | (4.1)  | 100                                  | (5.6)                | (16.4)                                    |
| <b>Self-reported race/ethnicity<sup>2,4</sup></b>          |                                 |        |                                      |                      |                                           |
| White                                                      | 14517                           | (93.6) | 1667                                 | (92.8)               | NA                                        |
| Other                                                      | 985                             | (6.4)  | 129                                  | (7.2)                | NA                                        |
| <b>Health region (#-name)<sup>2,3</sup></b>                |                                 |        |                                      |                      |                                           |
| 02-Saguenay-Lac-Saint-Jean                                 | 2234                            | (14.4) | 299                                  | (16.6)               | (3.3)                                     |
| 03-Capitale-Nationale                                      | 2811                            | (18.1) | 351                                  | (19.5)               | (9.0)                                     |
| 04-Mauricie et Centre-du-Québec                            | 1771                            | (11.4) | 213                                  | (11.9)               | (6.2)                                     |
| 05-Estrie                                                  | 2282                            | (14.7) | 277                                  | (15.4)               | (5.8)                                     |
| 06-Montréal                                                | 1518                            | (9.8)  | 103                                  | (5.7)                | (24.4)                                    |
| 07-Outaouais                                               | 1729                            | (11.2) | 263                                  | (14.6)               | (4.6)                                     |
| 12-Chaudière-Appalaches                                    | 744                             | (4.8)  | 100                                  | (5.6)                | (5.0)                                     |
| 13-Laval                                                   | 353                             | (2.3)  | 24                                   | (1.3)                | (5.1)                                     |
| 14-Lanaudière                                              | 252                             | (1.6)  | 18                                   | (1)                  | (6.0)                                     |
| 15-Laurentides                                             | 333                             | (2.1)  | 22                                   | (1.2)                | (7.4)                                     |
| 16-Montérégie                                              | 1259                            | (8.1)  | 108                                  | (6)                  | (16.6)                                    |
| Regions without fixed centers <sup>4</sup>                 | 126                             | (0.8)  | <11                                  | (<0.70) <sup>5</sup> | (6.4)                                     |
| Unknown or outside Québec                                  | 90                              | (0.6)  | <11                                  | (<0.70) <sup>5</sup> | NA                                        |
| <b>Number of vaccine doses received<sup>2,6</sup></b>      |                                 |        |                                      |                      |                                           |
| 0                                                          | 254                             | (1.6)  | NA                                   | NA                   |                                           |
| 1                                                          | 103                             | (0.7)  | NA                                   | NA                   | (91.6)                                    |
| 2                                                          | 5275                            | (34.0) | NA                                   | NA                   | (88.7)                                    |
| >2                                                         | 9561                            | (61.7) | NA                                   | NA                   | (47.1)                                    |
| Missing data <sup>7</sup>                                  | 309                             | (2.0)  | NA                                   | NA                   | NA                                        |
| <b>Prior documented COVID-19 infection<sup>2,6,8</sup></b> |                                 |        |                                      |                      |                                           |
| Yes                                                        | 1662                            | (10.7) | NA                                   | NA                   | (5.6)                                     |
| No                                                         | 13531                           | (87.3) | NA                                   | NA                   | (94.4)                                    |
| Missing data <sup>7</sup>                                  | 309                             | (2.0)  | NA                                   | NA                   | NA                                        |

1  
2  
3 **Abbreviation:** COVID-19 = coronavirus disease-19  
4  
5

6 **Notes:**  
7

- 8 1. For the general population of Québec, various data sources were used to capture variables of interest
  - 9 2. Demographics (i.e., sex, age, self-reported ethnicity, and health region) are reported as of 01-24-2022. Data on prior vaccination and documented infection are reported as of 01-24-2022.
  - 10 3. For the general population, data come from the following: Ministère de la Santé et des Services sociaux du Québec. Estimations et projections de population par territoire sociosanitaire. Available from: <https://publications.msss.gouv.qc.ca/msss/document-001617/>. Accessed on August 10, 2022.
  - 11 4. Includes (01-Bas-Saint-Laurent, 08-Abitibi-Témiscamingue, 09-Côte-Nord, 10-Nord-du-Québec, 11-Gaspésie-Îles-de-la-Madeleine, 17-Nunavik)
  - 12 5. Exact number is lower than 11, and is thus not reported to preserve donor anonymity
  - 13 6. For the general population, data come from the following: Institut national de santé publique du Québec. Données COVID-19 par âge et sexe - Évolution des cas. Available from: <https://www.inspq.qc.ca/covid-19/donnees/age-sexe/evolution-cas>. Accessed on 03-01-2022."
  - 14 7. Missing data are due to mismatches between donor information recorded in our institution's database and that recorded in governmental databases (N=309), )
  - 15 8. Data for the general population are underestimated since the age groups used in publicly available data (see footnote 7) exclude individuals aged 18-19 years.
- 16  
17  
18  
19  
20  
21  
22  
23  
24  
25  
26

27 At least two donations are available for nearly two thirds of the cohort (i.e., 65.6%), thereby  
28 enabling the conduct of longitudinal analyses (**Figure 1**). Most of these repeat donors  
29 appeared to donate regularly, with a median gap between donations ranging from 51.0 days  
30 for those with 2 donations to 11.8 days for those with  $\geq 15$  donations (median=29 days  
31 among those with  $\geq 2$  donations; **Figure 1**).

32  
33  
34  
35  
36  
37 Of note, loss to follow-up is not applicable to this cohort. Donors were free to donate  
38 plasma if and whenever they wanted: They did not consent to a strict protocol involving  
39 regular, scheduled visits at specific time points.

40  
41  
42  
43  
44  
45  
46  
47 Several variables are collected as part of routine donor screening. These variables include  
48 demographic characteristics (e.g., age, sex) and clinical characteristics (e.g., blood type,  
49 recent blood-borne infections, diabetes; see **Table 3** for detailed list of measurements),  
50 which (except for blood type) are all self-reported by the donor. Other variables related to  
51  
52  
53  
54  
55  
56  
57  
58  
59  
60

1  
2  
3 prior COVID-19 vaccination and infection were obtained by linking in-house donor data  
4 with the *Système d'information pour la protection des maladies infectieuses* (SI-PMI), a  
5 government vaccination registry. Infection data was obtained through the government  
6 platform (Trajectoire de Santé Publique – TSP). This information was added to carry out a  
7 mandate given by the Ministère de la santé et des services sociaux for the seroprevalence  
8 study only. Of note, data on mortality and other comorbidities that are not relevant for  
9 plasma donation are not available in the dataset.  
10  
11  
12  
13  
14  
15  
16  
17  
18  
19  
20  
21  
22  
23  
24  
25  
26  
27  
28  
29  
30  
31  
32  
33  
34  
35  
36  
37  
38  
39  
40  
41  
42  
43  
44  
45  
46  
47  
48  
49  
50  
51  
52  
53  
54  
55  
56  
57  
58  
59  
60

**Table 3 Summary of the principal\* variables collected or derived from the cohort**

| Variables                                                     | Baseline before vaccination/infection | After vaccination/infection information | Follow-up information |
|---------------------------------------------------------------|---------------------------------------|-----------------------------------------|-----------------------|
| <b>Internal Data</b>                                          |                                       |                                         |                       |
| <b>Questionnaire</b>                                          |                                       |                                         |                       |
| Demographics: Age/Sexe/Area RSS/Ethnicity                     | ✓                                     | ✓                                       | ✓                     |
| BMI calculated with                                           | ✓                                     | ✓                                       | ✓                     |
| Height                                                        | ✓                                     | ✓                                       | ✓                     |
| Weight                                                        | ✓                                     | ✓                                       | ✓                     |
| Medication use                                                |                                       |                                         |                       |
| Tobacco use                                                   |                                       |                                         | ✓                     |
| Blood pressure <sup>1</sup>                                   | ✓                                     |                                         |                       |
| Diabetes profile and treatment (without insulin) <sup>2</sup> | ✓                                     | ✓                                       | ✓                     |
| Occupational Status                                           |                                       |                                         | ✓                     |
| COVID-19 vaccination status <sup>3</sup>                      | ✓                                     | ✓                                       | ✓                     |
| History of PCR-detected infection <sup>4</sup>                | ✓                                     | ✓                                       | ✓                     |
| <b>Laboratory tests</b>                                       |                                       |                                         |                       |
| Hemoglobin level                                              | ✓                                     | ✓                                       | ✓                     |
| Blood type (ABO Rh genotype phenotype)                        | ✓                                     | ✓                                       | ✓                     |
| <b>External Data</b>                                          |                                       |                                         |                       |
| COVID-19 vaccination status <sup>5</sup>                      | ✓                                     | ✓                                       | ✓                     |
| History of PCR-detected infection <sup>6</sup>                | ✓                                     | ✓                                       | ✓                     |

**Note:**

- \* Several other variables such as donor interdictions, infectious state, etc. are routinely collected but not presented in this table
1. Available only for a subset of blood donor before COVIC-19 pandemic period
  2. Diabetes treated with insulin is an exclusion criterion for blood donation
  3. Reported by the donor



1  
2  
3  
4  
5  
6  
7  
8  
9  
10  
11  
12  
13  
14  
15  
16  
17  
18  
19  
20  
21  
22  
23  
24  
25  
26  
27  
28  
29  
30  
31  
32  
33  
34  
35  
36  
37  
38  
39  
40  
41  
42  
43  
44  
45  
46  
47

4. Reported by the donor
5. Provincial vaccination registry, Système d'information pour la protection des maladies infectieuses (SI-PMI)
6. Provincial COVID-19 infection registry, Trajectoire de Santé Publique – TSP

For peer review only

## Patient and Public Involvement

Patients or the public were not involved in the design, or conduct, or reporting, or dissemination plans of our research

## Findings to Date

### *Longitudinal assessment of COVID-19 immunity*

A study by Tauzin et al. used samples from our biobank to study the immune response to the mRNA vaccine BNT162b2 among SARS-CoV-2-naïve and previously infected (PI) individuals.[25] Specifically, anti-RBD titers, antibody binding, antibody-dependent cell-mediated cytotoxicity (ADCC), neutralization activity, and antibody avidity were assessed in the two groups after their first and second dose of vaccine. The impact of an extended interval (16 weeks vs 4 weeks) between the two doses of vaccine was also studied.

They observed that the levels of anti-RBD and anti-Spike antibodies as well as the capacity to recognize and neutralize different SARS-CoV-2 variants of PI individuals was increased after the first dose of vaccine and only minimally declined thereafter. Administration of the second dose to some PI individuals did not further increase the strength of the immune response compared to PI individuals vaccinated with only one dose.

In contrast, whereas the levels of SARS-CoV-2-specific antibodies as well as their functional activities increased in naïve individuals after the first dose of vaccine, the decline in antibody titers and functional activity was more pronounced compared to PI individuals. Administration of the second dose of vaccine permitted to reach much higher

1  
2  
3 antibody levels than after their first dose. These levels were similar to those observed in PI  
4  
5 individuals after their first or second dose of vaccine.  
6

7  
8  
9 Tauzin et al. additionally investigated the impact of an extended vaccine interval among  
10  
11 SARS-CoV-2-naïve individuals. With the exception of ADCC, all assays (antibody levels,  
12  
13 variant recognition and neutralization) were consistent with a better immune response  
14  
15 among individuals with an extended interval of ~16 weeks compared with those with an  
16  
17 interval of ~4 weeks between the two doses.  
18

### 19 20 21 *Serosurvey* 22

23  
24 A publicly available report from our institution used biobank samples to estimate the  
25  
26 seroprevalence of anti-SARS-CoV-2 antibodies in Québec from June 2021 – July 2021.[4]  
27  
28 This was the third phase of a serosurvey initiated in May 2020. Phases 1 (May-June 2020)  
29  
30 and 2 (January-March 2021) only included whole blood donors rather than plasma donors  
31  
32 from the biobank, since the PlasCoV project had not yet been launched. Phase 3 assessed  
33  
34 both anti-RBD and anti-N seroprevalence, since >80% of the population had received at  
35  
36 least one vaccine dose at the time of the serosurvey.[24]  
37  
38

39  
40  
41 The anti-RBD seroprevalence was 89.61%, consistent with the widespread vaccination  
42  
43 coverage during phase 3. However, the anti-N seroprevalence was only 6.43%, which was  
44  
45 lower than the anti-RBD seroprevalence among unvaccinated blood donors included in  
46  
47 phase 2 (i.e., 10.52%).  
48

49  
50  
51 This unexpected result was likely driven by seroreversion, which occurs faster for anti-N  
52  
53 than anti-S (or anti-RBD) antibodies.[26–28] Indeed, nearly 40% of PI donors in phase 3  
54  
55 tested seronegative for anti-N, likely because of seroreversion. This apparent rapid waning  
56  
57  
58  
59

1  
2  
3 of anti-N antibodies was also observed in a separate cohort of 54 PI donors who donated  
4 convalescent plasma used in the CONCOR-1 clinical trial.[29] After >200 days of follow-  
5 up, anti-N seroreversion occurred in 33.3% of donors, whereas anti-RBD seroreversion  
6 occurred in only 11.1% of donors. Taken together, these results suggest anti-N  
7 seroprevalence may only be adequate to capture relatively recent infections, thereby  
8 questioning its usefulness in serosurveys.[6] At the time of writing this manuscript, a fourth  
9 seroprevalence study is ongoing with PlasCoV samples, in which we are comparing anti-  
10 N responses pre- and post-infection to estimate the incidence of recent infections in the  
11 context of the Omicron wave.  
12  
13  
14  
15  
16  
17  
18  
19  
20  
21  
22  
23

### 24 **Collaboration**

25  
26  
27 All researchers in Canada or elsewhere may apply to access the PlasCoV biobank.  
28 Researchers will be asked to fill a form with high-level information on their project's  
29 objectives, methods, novelty, and relevance to the biobank's objectives. They will also be  
30 asked to justify the sample size needed and any particular inclusion criteria, and obtain  
31 ethics approval for their project.  
32  
33  
34  
35  
36  
37  
38  
39  
40  
41  
42  
43  
44  
45  
46  
47  
48  
49  
50  
51  
52  
53  
54  
55  
56  
57  
58  
59  
60

## Data Sharing Statement

Details on the PlasCoV biobank and the application process can be obtained through Héma-Québec's website at <https://www.hema-quebec.qc.ca/coronavirus/hema-quebec-en-contexte-de-pandemie/etude-plascov.en.html>. Enquiries can be sent by e-mail to [BiobanqueCOVID@hema-quebec.qc.ca](mailto:BiobanqueCOVID@hema-quebec.qc.ca), or alternately to Dr. Marc Germain ([Marc.Germain@hema-quebec.qc.ca](mailto:Marc.Germain@hema-quebec.qc.ca)), the biobank director.

## Funding Declaration

The project is entirely funded by the COVID-19 Immunity Task Force (CITF), which is supported by the Public Health Agency of Canada (PHAC). The views expressed herein do not necessarily reflect the views of the PHAC.

## Contributorship Statement

MG, AL, RB and CR conceived and designed the study. AL, AB, JP, and YG collected the data. AL and YG analyzed the data, with input from MG, RB, MD and CR. MG, AL, YG and RB drafted the manuscript and MD, AB, CR and JP critically revised it for important intellectual content. All authors approved the final version to be published.

## Ethics Approval

This study was approved by Héma-Québec Institutional review board. Individual informed consent was obtained from participants at the time of registration in the PlasCoV Biobank.

## Acknowledgments

1  
2  
3 Medical writing assistance was provided by Samuel Rochette, an employee of Héma-  
4 Québec.  
5  
6  
7

8 **Conflicts of interest:**  
9

10  
11 None.  
12  
13  
14  
15  
16  
17  
18  
19  
20  
21  
22  
23  
24  
25  
26  
27  
28  
29  
30  
31  
32  
33  
34  
35  
36  
37  
38  
39  
40  
41  
42  
43  
44  
45  
46  
47  
48  
49  
50  
51  
52  
53  
54  
55  
56  
57  
58  
59  
60

## References

- 1 Tremblay K, Rousseau S, Zawati MH, *et al.* The Biobanque québécoise de la COVID-19 (BQC19)—A cohort to prospectively study the clinical and biological determinants of COVID-19 clinical trajectories. *PloS One* 2021;**16**:e0245031.
- 2 Cevik M, Grubaugh ND, Iwasaki A, *et al.* COVID-19 vaccines: Keeping pace with SARS-CoV-2 variants. *Cell* 2021;**184**:5077–81.
- 3 Hie B, Zhong ED, Berger B, *et al.* Learning the language of viral evolution and escape. *Science* 2021;**371**:284–8.
- 4 Héma-Québec. Phase 3 de l'étude sur la séroprévalence des anticorps dirigés contre le SRAS-CoV-2 au Québec.
- 5 Jones JM, Stone M, Sulaeman H, *et al.* Estimated US Infection- and Vaccine-Induced SARS-CoV-2 Seroprevalence Based on Blood Donations, July 2020-May 2021. *JAMA* 2021;**326**:1400–9. doi:10.1001/jama.2021.15161
- 6 Bolotin S, Tran V, Osman S, *et al.* SARS-CoV-2 seroprevalence survey estimates are affected by anti-nucleocapsid antibody decline. *J Infect Dis* 2021;**223**:1334–8.
- 7 Arora RK, Joseph A, Van Wyk J, *et al.* SeroTracker: a global SARS-CoV-2 seroprevalence dashboard. *Lancet Infect Dis* 2021;**21**:e75–6. doi:10.1016/S1473-3099(20)30631-9
- 8 Dan JM, Mateus J, Kato Y, *et al.* Immunological memory to SARS-CoV-2 assessed for up to 8 months after infection. *Science* 2021;**371**.
- 9 Doria-Rose N, Suthar MS, Makowski M, *et al.* Antibody persistence through 6 months after the second dose of mRNA-1273 vaccine for Covid-19. *N Engl J Med* 2021;**384**:2259–61.
- 10 Ebinger JE, Fert-Bober J, Printsev I, *et al.* Antibody responses to the BNT162b2 mRNA vaccine in individuals previously infected with SARS-CoV-2. *Nat Med* 2021;**27**:981–4.
- 11 Goel RR, Apostolidis SA, Painter MM, *et al.* Distinct antibody and memory B cell responses in SARS-CoV-2 naïve and recovered individuals after mRNA vaccination. *Sci Immunol* 2021;**6**:eabi6950.
- 12 Gudbjartsson DF, Norddahl GL, Melsted P, *et al.* Humoral immune response to SARS-CoV-2 in Iceland. *N Engl J Med* 2020;**383**:1724–34.
- 13 He Z, Ren L, Yang J, *et al.* Seroprevalence and humoral immune durability of anti-SARS-CoV-2 antibodies in Wuhan, China: a longitudinal, population-level, cross-sectional study. *The Lancet* 2021;**397**:1075–84.

- 1  
2  
3 14 Krammer F, Srivastava K, Alshammary H, *et al.* Antibody responses in seropositive  
4 persons after a single dose of SARS-CoV-2 mRNA vaccine. *N Engl J Med*  
5 2021;**384**:1372–4.  
6  
7 15 Levin EG, Lustig Y, Cohen C, *et al.* Waning immune humoral response to BNT162b2  
8 Covid-19 vaccine over 6 months. *N Engl J Med* 2021;**385**:e84.  
9  
10 16 Planas D, Veyer D, Baidaliuk A, *et al.* Reduced sensitivity of SARS-CoV-2 variant  
11 Delta to antibody neutralization. *Nature* 2021;**596**:276–80.  
12  
13 17 Röltgen K, Powell AE, Wirz OF, *et al.* Defining the features and duration of antibody  
14 responses to SARS-CoV-2 infection associated with disease severity and outcome. *Sci*  
15 *Immunol* 2020;**5**.  
16  
17 18 Wang H, Yuan Y, Xiao M, *et al.* Dynamics of the SARS-CoV-2 antibody response up  
18 to 10 months after infection. *Cell Mol Immunol* 2021;:1–3.  
19  
20 19 Perreault J, Tremblay T, Fournier M-J, *et al.* Waning of SARS-CoV-2 RBD antibodies  
21 in longitudinal convalescent plasma samples within 4 months after symptom onset.  
22 *Blood* 2020;**136**:2588.  
23  
24 20 Malsagova K, Kopylov A, Stepanov A, *et al.* Biobanks—A Platform for Scientific and  
25 Biomedical Research. *Diagnostics* 2020;**10**:485.  
26  
27 21 Allen C, Joly Y, Moreno PG. Data sharing, biobanks and informed consent: a research  
28 paradox. *McGill JL Health* 2013;**7**:85.  
29  
30 22 Caulfield T, Murdoch B. Genes, cells, and biobanks: Yes, there’s still a consent  
31 problem. *PLoS Biol* 2017;**15**:e2002654.  
32  
33 23 O’Brien SF, Lieshout-Krikke RW, Lewin A, *et al.* Research initiatives of blood  
34 services worldwide in response to the covid-19 pandemic. *Vox Sang* 2021;**116**:296–  
35 304.  
36  
37 24 Institut national de santé publique du Québec. Données de vaccination contre la  
38 COVID-19 au Québec. 2021.<https://www.inspq.qc.ca/covid-19/donnees/vaccination>  
39 (accessed 17 Nov 2021).  
40  
41 25 Tauzin A, Gong SY, Beaudoin-Bussièrès G, *et al.* Strong humoral immune responses  
42 against SARS-CoV-2 Spike after BNT162b2 mRNA vaccination with a 16-week  
43 interval between doses. *Cell Host Microbe* 2021.  
44  
45 26 Whitcombe AL, McGregor R, Craigie A, *et al.* Comprehensive analysis of SARS-  
46 CoV-2 antibody dynamics in New Zealand. *Clin Transl Immunol* 2021;**10**.  
47 doi:10.1002/cti2.1261  
48  
49  
50  
51  
52  
53  
54  
55  
56  
57  
58  
59  
60



- 1  
2  
3 27 Ripperger TJ, Uhrlaub JL, Watanabe M, *et al.* Orthogonal SARS-CoV-2 serological  
4 assays enable surveillance of low-prevalence communities and reveal durable humoral  
5 immunity. *Immunity* 2020;**53**:925-933. e4.  
6  
7  
8 28 Cohen KW, Linderman SI, Moodie Z, *et al.* Longitudinal analysis shows durable and  
9 broad immune memory after SARS-CoV-2 infection with persisting antibody  
10 responses and memory B and T cells. *Cell Rep Med* 2021;**2**:100354.  
11 doi:10.1016/j.xcrm.2021.100354  
12  
13 29 Bégin P, Callum J, Heddle NM, *et al.* Convalescent plasma for adults with acute  
14 COVID-19 respiratory illness (CONCOR-1): study protocol for an international,  
15 multicentre, randomized, open-label trial. *Trials* 2021;**22**:1–17.  
16  
17  
18  
19  
20  
21  
22  
23  
24  
25  
26  
27  
28  
29  
30  
31  
32  
33  
34  
35  
36  
37  
38  
39  
40  
41  
42  
43  
44  
45  
46  
47  
48  
49  
50  
51  
52  
53  
54  
55  
56  
57  
58  
59  
60

**Figure 1. Average number of days between donations as function of the number of donations in PlasCoV**

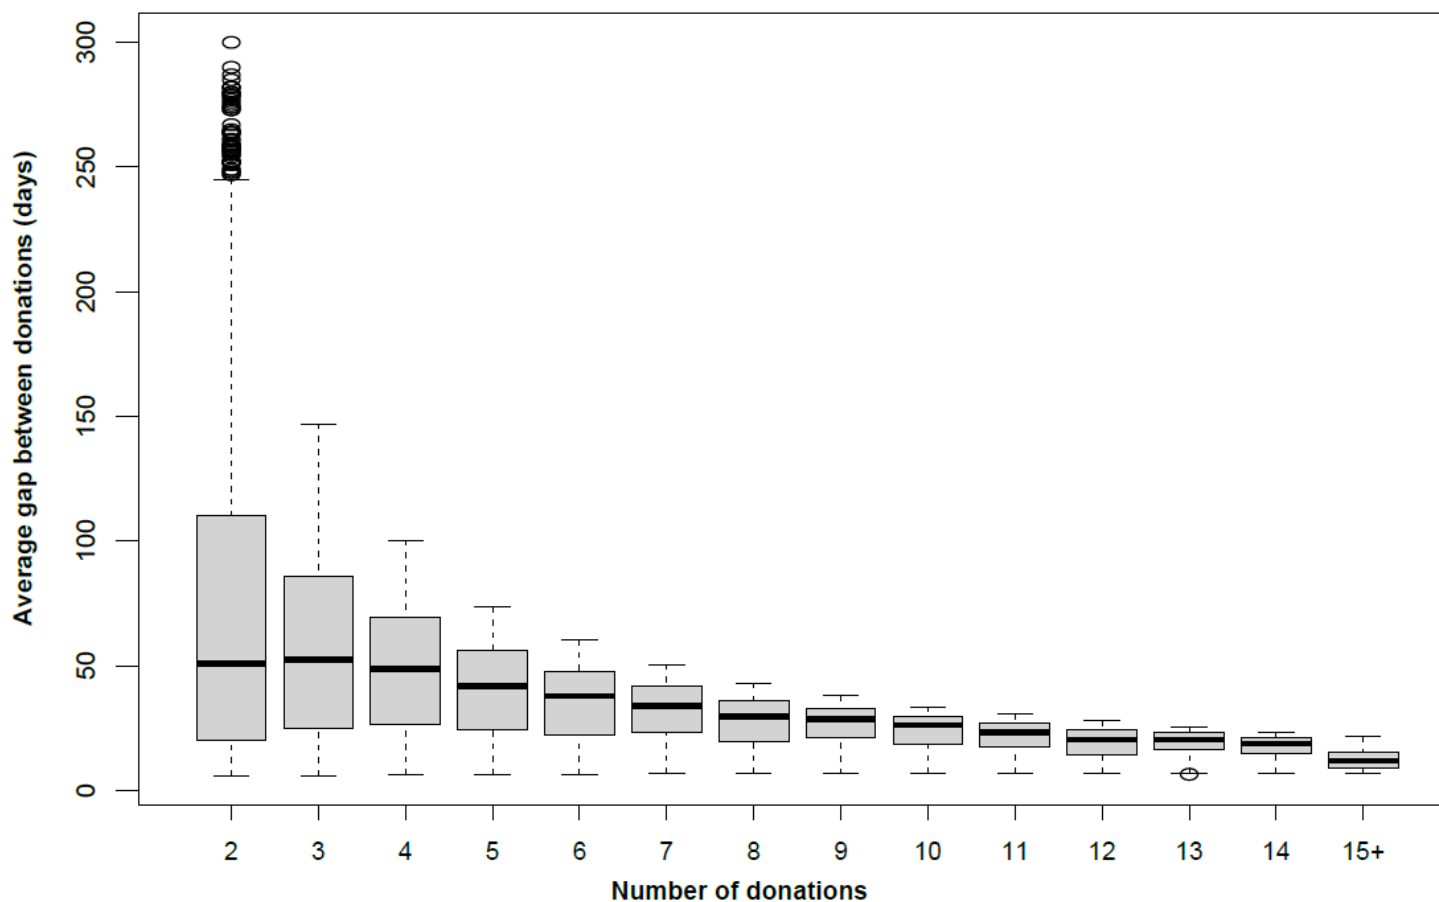

|                       |       |       |       |     |     |     |     |     |     |     |     |     |     |       |
|-----------------------|-------|-------|-------|-----|-----|-----|-----|-----|-----|-----|-----|-----|-----|-------|
| <b>Donors (N)</b>     | 2,498 | 1,505 | 1,045 | 758 | 567 | 441 | 344 | 355 | 274 | 209 | 177 | 187 | 165 | 1,631 |
| <b>Proportion (%)</b> | 16.1  | 9.7   | 6.7   | 4.9 | 3.7 | 2.8 | 2.2 | 2.3 | 1.8 | 1.3 | 1.1 | 1.2 | 1.1 | 10.5  |

# BMJ Open

## Cohort profile: A Québec-based plasma donor biobank to study COVID-19 immunity (PlasCoV)

|                                 |                                                                                                                                                                                                                                                          |
|---------------------------------|----------------------------------------------------------------------------------------------------------------------------------------------------------------------------------------------------------------------------------------------------------|
| Journal:                        | <i>BMJ Open</i>                                                                                                                                                                                                                                          |
| Manuscript ID                   | bmjopen-2022-068803.R1                                                                                                                                                                                                                                   |
| Article Type:                   | Cohort profile                                                                                                                                                                                                                                           |
| Date Submitted by the Author:   | 18-Jan-2023                                                                                                                                                                                                                                              |
| Complete List of Authors:       | Germain, Marc; Héma-Québec<br>Lewin, Antoine; Héma-Québec,<br>Bazin, Renée; Héma-Québec<br>Dieudé, Mélanie; Héma-Québec<br>Perreault, Josée; Héma-Québec<br>Boivin, Amélie; Héma-Québec<br>Grégoire, Yves; Héma-Québec<br>Renaud, Christian; Héma-Québec |
| <b>Primary Subject Heading</b>: | Public health                                                                                                                                                                                                                                            |
| Secondary Subject Heading:      | Infectious diseases, Immunology (including allergy), Public health                                                                                                                                                                                       |
| Keywords:                       | Blood bank & transfusion medicine < HAEMATOLOGY, Public health < INFECTIOUS DISEASES, COVID-19                                                                                                                                                           |
|                                 |                                                                                                                                                                                                                                                          |

SCHOLARONE™  
Manuscripts

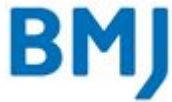

I, the Submitting Author has the right to grant and does grant on behalf of all authors of the Work (as defined in the below author licence), an exclusive licence and/or a non-exclusive licence for contributions from authors who are: i) UK Crown employees; ii) where BMJ has agreed a CC-BY licence shall apply, and/or iii) in accordance with the terms applicable for US Federal Government officers or employees acting as part of their official duties; on a worldwide, perpetual, irrevocable, royalty-free basis to BMJ Publishing Group Ltd ("BMJ") its licensees and where the relevant Journal is co-owned by BMJ to the co-owners of the Journal, to publish the Work in this journal and any other BMJ products and to exploit all rights, as set out in our [licence](#).

The Submitting Author accepts and understands that any supply made under these terms is made by BMJ to the Submitting Author unless you are acting as an employee on behalf of your employer or a postgraduate student of an affiliated institution which is paying any applicable article publishing charge ("APC") for Open Access articles. Where the Submitting Author wishes to make the Work available on an Open Access basis (and intends to pay the relevant APC), the terms of reuse of such Open Access shall be governed by a Creative Commons licence – details of these licences and which [Creative Commons](#) licence will apply to this Work are set out in our licence referred to above.

Other than as permitted in any relevant BMJ Author's Self Archiving Policies, I confirm this Work has not been accepted for publication elsewhere, is not being considered for publication elsewhere and does not duplicate material already published. I confirm all authors consent to publication of this Work and authorise the granting of this licence.

1  
2  
3 **Cohort profile: A Québec-based plasma donor biobank**  
4  
5 **to study COVID-19 immunity (PlasCoV)**  
6  
7

8 Marc Germain<sup>1\*</sup>, Antoine Lewin<sup>1</sup>, Renée Bazin<sup>1</sup>, Mélanie Dieudé<sup>1</sup>, Josée Perreault<sup>1</sup>,  
9  
10 Amélie Boivin<sup>1</sup>, Yves Grégoire<sup>1</sup>, Christian Renaud<sup>1</sup>  
11  
12

13  
14 <sup>1</sup> Medical Affairs and Innovation, Héma-Québec, Montréal and Québec, Canada  
15  
16

17  
18  
19 **Corresponding author:**  
20

21 Dr. Marc Germain, MD, PhD, FRCP(C)  
22

23 Vice-President, Medical Affairs and Innovation  
24

25 Héma-Québec  
26

27 1070 avenue des Sciences-de-la-Vie, Québec, QC G1V 5C3, Canada  
28

29 Phone: 1-418 780-4362  
30

31 E-mail: [marc.germain@hema-quebec.qc.ca](mailto:marc.germain@hema-quebec.qc.ca)  
32  
33

34  
35  
36  
37 **Word count:** 2,584

38  
39 **References:** 29

40  
41 **Tables and Figures:** 4  
42  
43  
44  
45  
46  
47  
48  
49  
50  
51  
52  
53  
54  
55  
56  
57  
58  
59  
60

## Abstract

### *Purpose*

The long-term humoral immunity to COVID-19 is not well understood owing to the continuous emergence of new variants of concern, the evolving vaccine- and infection-induced immunity, and the limited duration of follow-up in previous studies. As the sole blood service in Québec (Canada), we established a COVID-19-focused biobank (“PlasCoV”) in April 2021.

### *Participants*

As of January 2022, the biobank included 86,229 plasma samples from 15,502 regular donors (age range=18–84 years, females=49.7%), for an average of 5.6 donations per donor. Nearly two thirds (65.6%) of biobank donors made at least two donations, with many donors having provided samples pre- and post-vaccination (3061 [19.8%]) or pre- and post-infection (131 [0.9%]), thus allowing for longitudinal studies on vaccine- and infection-induced immunity.

### *Findings to date*

A study that used PlasCoV samples revealed that previously infected individuals who received a single dose of the BNT162b2 COVID-19 vaccine exhibited the strongest immune response. By contrast, SARS-CoV-2-naïve individuals required two vaccine doses to produce a maximal immune response. Furthermore, the results of a four-phase seroprevalence study indicated that the anti-nucleocapsid (N) response wanes rapidly, so that up to one third of previously infected donors were seronegative for anti-N.

### *Future plans*

This plasma biobank will facilitate the conduct of longitudinal studies on COVID-19 immunity, thus helping to provide valuable insights into the anti-SARS-CoV-2 immune response and its persistence, and the effects of vaccination and variants on the specificity of the anti-SARS-CoV-2 immune response.

For peer review only

### Strengths and limitations

- To the best of our knowledge, this would be the largest biobank of plasma samples dedicated to COVID-19 research, with >80,000 samples from >15,000 donors; new samples will continue to be added until March 2023.
- Furthermore, the large subset of donors with  $\geq 2$  samples (i.e., 65.6%) — along with the high frequency of donations in this subset (i.e., median: once every 29.0 days) — enables the conduct of longitudinal analyses on COVID-19 immunity.
- The cost of establishing the biobank was minimized since the infrastructure and personnel required for sample collection were already in place at our blood collection sites.
- Only plasma samples are available, such that the biobank cannot be used to study cell-mediated immunity.
- Despite the large sample, the plasma donor population is not fully representative of the overall Québec population, as expected since plasma donors typically reflect the healthy adult population.



## Introduction

Despite remarkable progress, our understanding of the long-term, humoral immunity to COVID-19 is incomplete owing to a number of challenges. The emergence of new variants of concern, such as Omicron, continuously challenges prior assumptions and data on the effectiveness and persistence of COVID-19 immunity [1,2]. Furthermore, amid mass vaccination, disentangling infection from vaccine-induced antibodies to SARS-CoV-2 has become increasingly difficult to inform public health authorities [3–5]. Notably, the vast majority of published serological studies used a cross-sectional design, and hence do not provide longitudinally collected data on COVID-19 immunity [6]. Lastly, the more limited number of longitudinal studies that have been conducted had follow-up periods <12 months [7–18] and lacked long-term funding commitment. Clearly, new initiatives are needed to overcome these barriers.

Historically, biobanks have spurred research efforts on novel or rare diseases [19] and would likely help address the aforementioned challenges for COVID-19 research. They do so using highly standardized, quality-controlled processes to analyze a large number of biological specimens which are made available to the research community. In addition, biobanks are subject to regulatory oversight to protect donors' rights. Virtually all biobanks collect a “broad” consent that allows for samples to be used for multiple research purposes [20]. For researchers, this practice (while controversial [21]) alleviates the burden associated with seeking consent.

However, existing COVID-19-focused biobanks are suboptimal to longitudinally study COVID-19 immunity. The *Biobanque québécoise de la COVID-19* (BCQ19) is a

1  
2  
3 biobanking initiative in Québec (Canada) that includes blood samples from individuals  
4 with a negative (controls) or positive SARS-CoV-2 PCR test result, with samples collected  
5 at several fixed time points for up to 24 months post-diagnosis (for non-hospitalized  
6 individuals) or post-hospitalization (for hospitalized individuals) [22]. However, BCQ19  
7 is limited in terms of sample size and population representativeness. Furthermore, the  
8 unavailability of samples prior to diagnosis or hospitalization hinders the study of the early  
9 immune response to COVID-19.  
10  
11  
12  
13  
14  
15  
16  
17  
18  
19

20 Blood services such as our institution (Héma-Québec – the only blood service operating in  
21 Québec) are ideally positioned to establish a biobank that would complement BCQ19 or  
22 other COVID-19-focused biobanks and better address researchers' needs. Indeed, blood  
23 services routinely collect biological specimens from donors in the general population,  
24 thereby substantially alleviating the high cost normally associated with the establishment  
25 of a biobank. Blood services have been key partners in conducting COVID-19 research  
26 since the beginning of the pandemic [23]; involving them in biobanking efforts is therefore  
27 a sound approach to fuel additional research on COVID-19 immunity.  
28  
29  
30  
31  
32  
33  
34  
35  
36  
37  
38

39 Here, we report on the establishment of a new biobank dedicated to COVID-19 research to  
40 inform public health in the province of Québec (Canada). The biobank consists of regular  
41 plasma donations collected throughout Québec, hence the name 'PlasCoV'. Because  
42 plasma donors can donate every 6 days at our institution, the biobank includes a large  
43 number of repeat donors for whom longitudinal analyses are feasible.  
44  
45  
46  
47  
48  
49  
50  
51  
52  
53  
54  
55  
56  
57  
58  
59  
60

## Cohort description

### *Cohort establishment and overview*

The project was initiated on February 23, 2021. A pilot phase was launched in March 2021, and the project was expanded to all of our fixed collection centers in April 2021. At that time, the majority of the Québec general population was unvaccinated [24], which enabled us to collect samples pre- and post-vaccination for many donors.

Ten fixed blood centers — all located in large or medium size ( $\geq 100,000$  population) areas — were designated to collect biobank-dedicated samples (**Table 1**). The resulting donor cohort is therefore broadly representative of plasma donors living in urban and suburban areas throughout Québec.

**Table 1. Number of samples collected by each blood center as of January 24, 2022.**

| Center name                    | Metropolitan area | Health region (#-name)          | Samples collected, N (%) |        |
|--------------------------------|-------------------|---------------------------------|--------------------------|--------|
| Globule - Centre Laval         | Montréal          | 13-Laval                        | 3909                     | (4.1)  |
| Globule - Kirkland             | Montréal          | 06-Montréal                     | 2574                     | (2.7)  |
| Globule - Quartier Dix30       | Montréal          | 16-Montérégie                   | 5134                     | (5.4)  |
| Globule - Place Versailles     | Montréal          | 06-Montréal                     | 3205                     | (3.3)  |
| Globule - Quartier Lebourgneuf | Québec city       | 03-Capitale Nationale           | 11260                    | (11.7) |
| Globule - Sainte-Foy           | Québec city       | 03-Capitale Nationale           | 11391                    | (11.9) |
| Plasmavie - Gatineau           | Gatineau          | 08-Outaouais                    | 11878                    | (12.4) |
| Plasmavie - Saguenay           | Saguenay          | 02-Saguenay-Lac-St-Jean         | 17325                    | (18.1) |
| Plasmavie - Sherbrooke         | Sherbrooke        | 05-Estrie                       | 16669                    | (17.4) |
| Plasmavie - Trois-Rivières     | Trois-Rivières    | 04-Mauricie et Centre du Québec | 12627                    | (13.2) |

The biobank includes samples from a population-based cohort of healthy, voluntary, non-remunerated donors of plasma for fractionation who consented that their samples be used for research purposes. Specifically, the pre-donation questionnaire asks donors if they are willing to give part of their routine donation for research purposes. A donor's consent is considered valid for all donations, and so those who consent are not asked this question at subsequent donations. [A donor can decide at any time, simply by giving verbal notice, to](#)

1  
2  
3 [withdraw his/her consent for the use of his/her samples and data.](#) A 3 ml sample is collected  
4  
5 from the plasma bag and frozen for biobanking, and aliquots of 200 µL to 500 µL of the  
6  
7 thawed, biobanked sample can be provided upon request (so that each sample can be used  
8  
9 to prepare at least 6 aliquots upon thawing).  
10

### 11 12 13 *Variables*

14  
15  
16 In addition to plasma samples, the biobank offers access to several variables that are  
17  
18 collected as part of routine donor screening or linked to government registries. Variables  
19  
20 collected as part of routine blood donation include demographic characteristics (e.g., age,  
21  
22 sex) and clinical characteristics (e.g., blood type, recent blood-borne infections, diabetes),  
23  
24 which (except for blood type) are all self-reported by the donor (**Table 2**). Data on COVID-  
25  
26 19 vaccination were obtained by linking in-house donor data with the *Système*  
27  
28 *d'information pour la protection des maladies infectieuses* (SI-PMI) — a government  
29  
30 registry that captures all COVID-19 vaccinations covered by the universal, public health  
31  
32 insurance in Québec (i.e., by the *Régie de l'assurance maladie du Québec*). Similarly, data  
33  
34 on COVID-19 infections were obtained by linking in-house data with the *Trajectoire de*  
35  
36 *Santé Publique* (TSP) — a government registry that captures data on SARS-CoV-2  
37  
38 infections detected by PCR tests performed on nasopharyngeal swabs. These tests were  
39  
40 freely available to anyone experiencing COVID-19-related symptoms at the beginning of  
41  
42 the pandemic, but have been restricted to priority groups (i.e., primarily health care workers  
43  
44 and individuals aged  $\geq 70$ ) since January 5, 2022. If needed, additional variables (e.g., as  
45  
46 tobacco use, medication use, and occupational status) can be obtained through a  
47  
48 supplemental questionnaire filled by donors during their donation.  
49  
50  
51  
52  
53  
54  
55  
56  
57  
58  
59  
60

**Table 2. Summary of the main variables\* collected or derived from the cohort.**

| Variables                                                     | Information collected before vaccination/infection | Information collected after vaccination/infection | Information routinely collected at pre-donation screening |
|---------------------------------------------------------------|----------------------------------------------------|---------------------------------------------------|-----------------------------------------------------------|
| <b>Internal Data</b>                                          |                                                    |                                                   |                                                           |
| <b>Donor questionnaire</b>                                    |                                                    |                                                   |                                                           |
| Demographics: Age/Sex/Health region/Ethnicity                 | X                                                  | X                                                 | X                                                         |
| BMI calculated with                                           | X                                                  | X                                                 | X                                                         |
| Height                                                        | X                                                  | X                                                 | X                                                         |
| Weight                                                        | X                                                  | X                                                 | X                                                         |
| Blood pressure <sup>1</sup>                                   | X                                                  |                                                   |                                                           |
| Diabetes profile and treatment (without insulin) <sup>2</sup> | X                                                  | X                                                 | X                                                         |
| COVID-19 vaccination status <sup>3</sup>                      | X                                                  | X                                                 | X                                                         |
| History of PCR-confirmed infection <sup>4</sup>               | X                                                  | X                                                 | X                                                         |
| <b>Laboratory tests</b>                                       |                                                    |                                                   |                                                           |
| Hemoglobin level                                              | X                                                  | X                                                 | X                                                         |
| Blood type (ABO and Rh genotype or phenotype)                 | X                                                  | X                                                 | X                                                         |
| <b>External Data</b>                                          |                                                    |                                                   |                                                           |
| COVID-19 vaccination status <sup>5</sup>                      | X                                                  | X                                                 | X                                                         |
| History of PCR-detected infection <sup>6</sup>                | X                                                  | X                                                 | X                                                         |

**Abbreviation:** COVID-19 = coronavirus disease-19

**Notes:**

- \* Several other variables such as donor deferrals, infectious state, etc. are routinely collected but are not presented in this table.
- 1. Available only for a subset of blood donor before the COVID-19 pandemic.
- 2. Diabetes treated with insulin is an exclusion criterion for blood donation.
- 3. Reported by the donor.
- 4. Reported by the donor.

1  
2  
3  
4  
5  
6  
7  
8  
9  
10  
11  
12  
13  
14  
15  
16  
17  
18  
19  
20  
21  
22  
23  
24  
25  
26  
27  
28  
29  
30  
31  
32  
33  
34  
35  
36  
37  
38  
39  
40  
41  
42  
43  
44  
45  
46  
47

5. From the provincial vaccination registry *Système d'information pour la protection des maladies infectieuses (SI-PMI)*.
6. From the provincial COVID-19 infection registry *Trajectoire de Santé Publique – TSP*.

For peer review only

### *Participant characteristics*

As of January 24, 2022, 15,502 out of 17,070 (90.8%) donors consented to have a small volume of their donations used for research on COVID-19 (**Table 3**). No donor recruitment campaign was specifically undertaken for this research initiative. The recruitment of new donors ended on October 1, 2022; however, donations from individuals who consented to participate before October 1, 2022 will be collected up until March 31, 2023.

Donor characteristics were assessed as of January 24, 2022. Among consenting donors, median age was 43.0 years (**Table 3**). The six health regions where donors most often lived were Capitale-Nationale (18.1%), Estrie (14.7%), Saguenay-Lac-Saint-Jean (14.4%), Mauricie et Centre-du-Québec (11.4%), Outaouais (11.2%), and Montréal (9.8%). The cohort predominantly included donors who self-identified as white (93.6%). Relative to non-consenting donors, consenting donors tended to be younger (i.e., median age: 43.0 vs. 48.0 years), and included slightly more female donors (i.e., 49.7% vs. 46.3%) and more residents of urban areas (e.g., Montreal-Laval region: 12.1% vs. 8.1%). Relative to the Québec general population, consenting donors had a similar age and sex distribution, but the densely populated region of Montreal-Laval was underrepresented (12.1% vs. 29.5%).

A key feature of this biobank is the availability of multiple, longitudinally collected plasma samples and associated data. As of January 24, 2022, the biobank had collected 86,229 samples from 15,502 donors, for an average of 5.6 donations per donor. At least two donations are available for nearly two thirds of the cohort (i.e., 65.6%), thereby enabling the conduct of longitudinal analyses (**Figure 1**). Most of these repeat donors appeared to donate regularly, with a median gap between donations ranging from 51.0 days for those

1  
2  
3 with 2 donations to 11.8 days for those with  $\geq 15$  donations (median=29.0 days among those  
4  
5 with  $\geq 2$  donations; **Figure 1**).

6  
7  
8 The cohort includes 3061 donors with samples collected pre- and post-vaccination, thereby  
9  
10 enabling the study of vaccine-induced immunity in a real-world population of vaccine-  
11  
12 naïve individuals. The cohort also includes 10,551 donors with samples collected only  
13  
14 post-vaccination. Finally, the cohort includes 1326 donors with sample collected only pre-  
15  
16 vaccination and 564 donors with no vaccination history or missing information.

17  
18  
19 The vast majority (i.e., 96.4%) of donors had received  $\geq 1$  vaccine dose, and 95.7% had  
20  
21 received  $\geq 2$  doses; only 1.6% were unvaccinated. In Québec, the second vaccine dose was  
22  
23 delayed for up to 16 weeks to optimize population-level immunity amid concerns over  
24  
25 limited vaccine supply. As a result, a large proportion of plasma donors (i.e., 14.6%)  
26  
27 received their second dose 85-112 days after their first dose, but some received it within  
28  
29 the  $\square 3$ -week gap recommended by the manufacturer (i.e., 1.9% within 4 weeks). This  
30  
31 notable feature of our biobank may be used to study the impact of vaccine dose intervals  
32  
33 on the immune response, as done by Tauzin et al. [25] (described in more details further  
34  
35 down).

36  
37  
38 The following vaccines have been administered in Québec: ChAdOx1-S, BNT162b2, and  
39  
40 mRNA-1273. Some individuals have received combinations of these vaccines, which was  
41  
42 allowed by public health authorities to help fast-track the vaccination campaign.

43  
44  
45 Overall, 1662 (10.7%) donors had a documented infection as of January 24, 2022 (**Table**  
46  
47 **3**), including 131 (7.9%) donors with available samples before and after a documented  
48  
49 infection. This seemingly low number of donors who contracted SARS-CoV-2 between  
50  
51  
52  
53  
54  
55  
56  
57  
58  
59  
60



1  
2  
3 two donations is largely driven by the low number of at-risk patients (i.e., either because  
4 they donated only once [N=712 (42.8%)], or because the timing of their infection left little  
5  
6 time for a donation before January 24, 2022).  
7  
8  
9  
10  
11  
12  
13  
14  
15  
16  
17  
18  
19  
20  
21  
22  
23  
24  
25  
26  
27  
28  
29  
30  
31  
32  
33  
34  
35  
36  
37  
38  
39  
40  
41  
42  
43  
44  
45  
46  
47  
48  
49  
50  
51  
52  
53  
54  
55  
56  
57  
58  
59  
60

| <b>Table 3. Donor characteristics as of January 24, 2022.</b>       | <b>Consenting donors (N=15,502)</b> |        | <b>Non-consenting donors (N=1568)</b> |                      | <b>General, adult population<sup>1</sup></b> |
|---------------------------------------------------------------------|-------------------------------------|--------|---------------------------------------|----------------------|----------------------------------------------|
| <b>Sex,<sup>2</sup> n (%)</b>                                       |                                     |        |                                       |                      |                                              |
| Female                                                              | 7709                                | (49.7) | 831                                   | (46.3)               | (50.2)                                       |
| <b>Age (years),<sup>2,3</sup> mean <math>\pm</math> SD (median)</b> | 43.9 $\pm$ 16.8 (43.0)              |        | 46.1 $\pm$ 16.7 (48.0)                |                      | 50.2 $\pm$ 18.8 (50.0)                       |
| <b>Age (years),<sup>2,3</sup> n (%)</b>                             |                                     |        |                                       |                      |                                              |
| 18-29                                                               | 4399                                | (28.4) | 433                                   | (24.1)               | (17.1)                                       |
| 30-39                                                               | 2556                                | (16.5) | 269                                   | (15)                 | (16.0)                                       |
| 40-49                                                               | 2287                                | (14.8) | 251                                   | (14)                 | (16.1)                                       |
| 50-59                                                               | 2440                                | (15.7) | 335                                   | (18.7)               | (16.1)                                       |
| 60-70                                                               | 3178                                | (20.5) | 408                                   | (22.7)               | (18.3)                                       |
| $\geq$ 71                                                           | 642                                 | (4.1)  | 100                                   | (5.6)                | (16.4)                                       |
| <b>Self-reported race/ethnicity,<sup>2,4</sup> n (%)</b>            |                                     |        |                                       |                      |                                              |
| White                                                               | 14517                               | (93.6) | 1667                                  | (92.8)               | NA                                           |
| Other                                                               | 985                                 | (6.4)  | 129                                   | (7.2)                | NA                                           |
| <b>Health region (#-name),<sup>2,3</sup> n (%)</b>                  |                                     |        |                                       |                      |                                              |
| 02-Saguenay-Lac-Saint-Jean                                          | 2234                                | (14.4) | 299                                   | (16.6)               | (3.3)                                        |
| 03-Capitale-Nationale                                               | 2811                                | (18.1) | 351                                   | (19.5)               | (9.0)                                        |
| 04-Mauricie et Centre-du-Québec                                     | 1771                                | (11.4) | 213                                   | (11.9)               | (6.2)                                        |
| 05-Estrie                                                           | 2282                                | (14.7) | 277                                   | (15.4)               | (5.8)                                        |
| 06-Montréal                                                         | 1518                                | (9.8)  | 103                                   | (5.7)                | (24.4)                                       |
| 07-Outaouais                                                        | 1729                                | (11.2) | 263                                   | (14.6)               | (4.6)                                        |
| 12-Chaudière-Appalaches                                             | 744                                 | (4.8)  | 100                                   | (5.6)                | (5.0)                                        |
| 13-Laval                                                            | 353                                 | (2.3)  | 24                                    | (1.3)                | (5.1)                                        |
| 14-Lanaudière                                                       | 252                                 | (1.6)  | 18                                    | (1)                  | (6.0)                                        |
| 15-Laurentides                                                      | 333                                 | (2.1)  | 22                                    | (1.2)                | (7.4)                                        |
| 16-Montérégie                                                       | 1259                                | (8.1)  | 108                                   | (6)                  | (16.6)                                       |
| Regions without fixed centers <sup>4</sup>                          | 126                                 | (0.8)  | <11                                   | (<0.70) <sup>5</sup> | (6.4)                                        |
| Unknown or outside Québec                                           | 90                                  | (0.6)  | <11                                   | (<0.70) <sup>5</sup> | NA                                           |
| <b>Number of vaccine doses received,<sup>2,6</sup> n (%)</b>        |                                     |        |                                       |                      |                                              |
| 0                                                                   | 254                                 | (1.6)  | NA                                    | NA                   |                                              |
| 1                                                                   | 103                                 | (0.7)  | NA                                    | NA                   | (91.6)                                       |
| 2                                                                   | 5275                                | (34.0) | NA                                    | NA                   | (88.7)                                       |
| >2                                                                  | 9561                                | (61.7) | NA                                    | NA                   | (47.1)                                       |
| Missing data <sup>7</sup>                                           | 309                                 | (2.0)  | NA                                    | NA                   | NA                                           |

| <b>Documented COVID-19 infection,<sup>2,6,8</sup> n (%)</b> |       |        |    |    |        |
|-------------------------------------------------------------|-------|--------|----|----|--------|
| Yes                                                         | 1662  | (10.7) | NA | NA | (5.6)  |
| No                                                          | 13531 | (87.3) | NA | NA | (94.4) |
| Missing data <sup>7</sup>                                   | 309   | (2.0)  | NA | NA | NA     |

**Abbreviations:** COVID-19 = coronavirus disease-19; SD = standard deviation

#### Notes:

1. For the general population of Québec, various data sources were used to capture variables of interest.
2. Demographics (i.e., sex, age, self-reported ethnicity, and health region) are reported as of 01-24-2022. Data on prior vaccination and documented infection are reported as of 01-24-2022.
3. For the general population, data come from the following: Ministère de la Santé et des Services sociaux du Québec. Estimations et projections de population par territoire sociosanitaire. Available from: <https://publications.msss.gouv.qc.ca/msss/document-001617/>. Accessed on August 10, 2022.
4. Includes (01-Bas-Saint-Laurent, 08-Abitibi-Témiscamingue, 09-Côte-Nord, 10-Nord-du-Québec, 11-Gaspésie-Îles-de-la-Madeleine, 17-Nunavik).
5. The exact number is lower than 11 and is thus not reported to preserve donor anonymity.
6. For the general population, data come from the following: Institut national de santé publique du Québec. Données COVID-19 par âge et sexe - Évolution des cas. Available from: <https://www.inspq.qc.ca/covid-19/donnees/age-sexe/evolution-cas>. Accessed on 03-01-2022."
7. Missing data are due to mismatches between donor information recorded in our institution's database and that recorded in governmental databases (N=309).
8. Data for the general population are underestimated since the age groups used in publicly available data (see footnote 7) exclude individuals aged 18-19 years.

#### *Funding*

The project is entirely funded by the COVID-19 Immunity Task Force (CITF), a government-funded working group dedicated to advancing knowledge and research on COVID-19 in Canada and to inform public health authorities. CITF has provided a long-term funding commitment (i.e., 2 years) for this biobank project, which will enable the conduct of long-term studies on infection- and vaccine-induced immunity to COVID-19.

#### **Patient and Public Involvement**

Patients or the public were not involved in the design, or conduct, or reporting, or dissemination plans of our research

## Findings to Date

### *Longitudinal assessment of COVID-19 immunity*

A study by Tauzin et al. used samples from our biobank to study the immune response to the mRNA vaccine BNT162b2 among SARS-CoV-2-naïve and previously infected individuals [25]. The authors found that, in previously infected individuals, the immune response was strengthened after the first dose of vaccine and minimally declined thereafter. The administration of a second dose did not further increase the strength of the immune response. By contrast, in SARS-CoV-2-naïve individuals, the administration of a second dose further strengthened the immune response (except for antibody-mediated cell cytotoxicity [ADCC], which appeared more transient).

Tauzin et al. additionally investigated the impact of using an extended interval between the two vaccine doses in SARS-CoV-2-naïve individuals. With the exception of ADCC, all assays were consistent with a better immune response when administering the two doses ~16 weeks apart compared with ~4 weeks apart.

### *Serosurvey*

A publicly available report from our institution used biobank samples to estimate the seroprevalence of anti-SARS-CoV-2 antibodies in Québec from June 2021 – July 2021 [3]. This was the third phase of a serosurvey initiated in May 2020. Phases 1 (May–June 2020) and 2 (January–March 2021) only included whole blood donors rather than plasma donors from the biobank, since the PlasCoV project had not yet been launched. Phase 3 assessed both anti-receptor binding domain (RBD) and anti-nucleocapsid (N) seroprevalence, since

1  
2  
3 >80% of the population had received at least one vaccine dose at the time of the serosurvey  
4  
5 [24].  
6  
7

8 The anti-RBD seroprevalence was 89.6%, consistent with the widespread vaccination  
9 coverage during phase 3. However, the anti-N seroprevalence was only 6.4%, which was  
10 lower than the anti-RBD seroprevalence among unvaccinated blood donors included in  
11 phase 2 (i.e., 10.5%). This unexpected result was likely driven by seroreversion, which  
12 occurs faster for anti-N than anti-spike (or anti-RBD) antibodies [26–28]. Indeed, nearly  
13 40% of previously infected donors in phase 3 were seronegative for anti-N, likely because  
14 of seroreversion. This apparent rapid waning of anti-N antibodies was also observed in a  
15 separate cohort of 54 previously infected donors of convalescent plasma used in the  
16 CONCOR-1 clinical trial [29]. After more than 200 days of follow-up, anti-N seroreversion  
17 occurred in 33.3% of these donors, whereas anti-RBD seroreversion occurred in only  
18 11.1% of donors.  
19  
20  
21  
22  
23  
24  
25  
26  
27  
28  
29  
30  
31  
32  
33

34 Taken together, these results suggest anti-N seroprevalence may only be adequate to  
35 capture relatively recent infections, thereby questioning its usefulness in serosurveys  
36 analyzed using conventional analytical approaches (i.e., using a hard threshold applied at  
37 a single time point to determine seropositivity) [5]. At the time of writing this manuscript,  
38 the fourth phase of this study is underway and uses PlasCoV samples to compare anti-N  
39 responses pre- and post-infection — a new approach to estimate the incidence of recent  
40 infections in the context of the Omicron wave.  
41  
42  
43  
44  
45  
46  
47  
48  
49  
50  
51  
52  
53  
54  
55  
56  
57  
58  
59  
60

## Future plans

The herein described plasma biobank will help conduct longitudinal studies on COVID-19 immunity. The resulting evidence will provide valuable insights on several aspects of the immune response to COVID-19, including its persistence, its specificity against variants, and the effects of vaccination.

Future studies using this biobank are already planned or underway. Our organization will continue using PlasCoV samples for an ongoing anti-SARS-CoV-2 serosurvey up until March, 2023 (see above description). The biobank will also prove useful to address other research questions in public health such as hybrid immunity, response to emerging variants or new vaccine formulations. For example, another study will soon be conducted to estimate the impact of post-COVID-19 syndrome (a.k.a., long COVID) in a healthy, adult population using this large, prospective longitudinal cohort.

## Strengths and limitations

The herein described biobank has several strengths. To the best of our knowledge, this would be the largest biobank of plasma samples dedicated to COVID-19 research, with >80,000 samples from >15,000 donors and new samples continually being added until March 2023. Furthermore, the large subset of donors with  $\geq 2$  samples (65.6%) — along with the high frequency of donations in this subset (i.e., median: once every 29.0 days) — enables the conduct of longitudinal analyses on COVID-19 immunity. Another strength is that donors provided a broad consent, which allows researchers to recontact them for other projects (e.g., supplemental questionnaire). Lastly, the cost of establishing the biobank was minimized since the infrastructure and personnel required for sample collection were

1  
2  
3 already in place at our blood collection sites. Given these strengths, our biobank may serve  
4  
5 as a model for other blood operators and government partners who would be interested in  
6  
7 reproducing our initiative elsewhere.  
8  
9

10  
11 Certain limitations should nonetheless be considered when using our biobank samples. To  
12  
13 begin, the large number of samples is made possible in part because donors are free to  
14  
15 donate whenever they want, i.e., they did not agree to participate in a research that involves  
16  
17 a rigid protocol with scheduled visits. As a result, samples are not collected systematically  
18  
19 after an event of interest, such as vaccination or infection, although the large number of  
20  
21 samples as well as the participation of frequent donors who provide samples on a regular  
22  
23 basis thereby increasing the likelihood of having samples within a reasonable time frame  
24  
25 relative to vaccination or infection, mitigate this limitation. Furthermore, only plasma  
26  
27 samples are available, so that the biobank cannot be used to study cell-mediated immunity.  
28  
29 Researchers interested in studying cell-mediated immunity may want to contact BCQ19,  
30  
31 which routinely collects peripheral blood mononuclear cells [22]. Moreover, despite the  
32  
33 large sample, the plasma donor population is not fully representative of the overall Québec  
34  
35 population, as expected since plasma donors are typically more representative of the  
36  
37 healthy adult population. All exclusion criteria for plasma donations were also exclusion  
38  
39 criteria for the biobank, including immunodeficiencies, active infection, and recent cancer  
40  
41 among other chronic diseases. In addition, the database associated with our biobank does  
42  
43 not include information on disease severity, such as hospitalization or intensive care unit  
44  
45 admission, mortality, and comorbidities. Lastly, the database does not include information  
46  
47 on socioeconomic status, such as income and education. However, the six-digit zip code  
48  
49 can be used to generate a proxy index for socioeconomic status.  
50  
51  
52  
53  
54  
55  
56  
57  
58  
59  
60

## Collaboration

All researchers in Canada or elsewhere may apply to access the PlasCoV biobank. Researchers will be asked to fill a form with high-level information on their project's objectives, methods, novelty, and relevance to the biobank's objectives. They will also be asked to justify the sample size needed and any particular inclusion criteria, and to obtain ethics approval for their project.

## Data sharing statement

Details on the PlasCoV biobank and the application process can be obtained through Héma-Québec's website at <https://www.hema-quebec.qc.ca/coronavirus/hema-quebec-en-contexte-de-pandemie/etude-plascov.en.html>. Enquiries can be sent by e-mail to [BiobanqueCOVID@hema-quebec.qc.ca](mailto:BiobanqueCOVID@hema-quebec.qc.ca), or alternately to Dr. Marc Germain ([Marc.Germain@hema-quebec.qc.ca](mailto:Marc.Germain@hema-quebec.qc.ca)), the biobank director.

## Funding declaration

The project is entirely funded by the COVID-19 Immunity Task Force (CITF), which is supported by the Public Health Agency of Canada (PHAC). The views expressed herein do not necessarily reflect the views of the PHAC.



### **Contributorship statement**

MG, AL, RB and CR conceived and designed the study. AL, AB, JP, and YG collected the data. AL and YG analyzed the data, with input from MG, RB, MD and CR. MG, AL, YG and RB drafted the manuscript and MD, AB, CR and JP critically revised it for important intellectual content. All authors approved the final version to be published.

### **Ethics approval**

This study was approved by Héma-Québec Institutional review board. Individual informed consent was obtained from participants at the time of registration in the PlasCoV Biobank.

### **Acknowledgments**

Medical writing assistance was provided by Samuel Rochette, an employee of Héma-Québec.

### **Competing interest**

No competing interest.

## References

- 1 Cevik M, Grubaugh ND, Iwasaki A, *et al.* COVID-19 vaccines: Keeping pace with SARS-CoV-2 variants. *Cell* 2021;**184**:5077–81.
- 2 Hie B, Zhong ED, Berger B, *et al.* Learning the language of viral evolution and escape. *Science* 2021;**371**:284–8.
- 3 Héma-Québec. Phase 3 de l'étude sur la séroprévalence des anticorps dirigés contre le SRAS-CoV-2 au Québec.
- 4 Jones JM, Stone M, Sulaeman H, *et al.* Estimated US Infection- and Vaccine-Induced SARS-CoV-2 Seroprevalence Based on Blood Donations, July 2020-May 2021. *JAMA* 2021;**326**:1400–9. doi:10.1001/jama.2021.15161
- 5 Bolotin S, Tran V, Osman S, *et al.* SARS-CoV-2 seroprevalence survey estimates are affected by anti-nucleocapsid antibody decline. *J Infect Dis* 2021;**223**:1334–8.
- 6 Arora RK, Joseph A, Van Wyk J, *et al.* SeroTracker: a global SARS-CoV-2 seroprevalence dashboard. *Lancet Infect Dis* 2021;**21**:e75–6. doi:10.1016/S1473-3099(20)30631-9
- 7 Dan JM, Mateus J, Kato Y, *et al.* Immunological memory to SARS-CoV-2 assessed for up to 8 months after infection. *Science* 2021;**371**.
- 8 Doria-Rose N, Suthar MS, Makowski M, *et al.* Antibody persistence through 6 months after the second dose of mRNA-1273 vaccine for Covid-19. *N Engl J Med* 2021;**384**:2259–61.
- 9 Ebinger JE, Fert-Bober J, Printsev I, *et al.* Antibody responses to the BNT162b2 mRNA vaccine in individuals previously infected with SARS-CoV-2. *Nat Med* 2021;**27**:981–4.
- 10 Goel RR, Apostolidis SA, Painter MM, *et al.* Distinct antibody and memory B cell responses in SARS-CoV-2 naïve and recovered individuals after mRNA vaccination. *Sci Immunol* 2021;**6**:eabi6950.
- 11 Gudbjartsson DF, Norddahl GL, Melsted P, *et al.* Humoral immune response to SARS-CoV-2 in Iceland. *N Engl J Med* 2020;**383**:1724–34.
- 12 He Z, Ren L, Yang J, *et al.* Seroprevalence and humoral immune durability of anti-SARS-CoV-2 antibodies in Wuhan, China: a longitudinal, population-level, cross-sectional study. *The Lancet* 2021;**397**:1075–84.
- 13 Krammer F, Srivastava K, Alshammary H, *et al.* Antibody responses in seropositive persons after a single dose of SARS-CoV-2 mRNA vaccine. *N Engl J Med* 2021;**384**:1372–4.

- 1  
2  
3 14 Levin EG, Lustig Y, Cohen C, *et al.* Waning immune humoral response to BNT162b2  
4 Covid-19 vaccine over 6 months. *N Engl J Med* 2021;**385**:e84.  
5  
6 15 Planas D, Veyer D, Baidaliuk A, *et al.* Reduced sensitivity of SARS-CoV-2 variant  
7 Delta to antibody neutralization. *Nature* 2021;**596**:276–80.  
8  
9 16 Röltgen K, Powell AE, Wirz OF, *et al.* Defining the features and duration of antibody  
10 responses to SARS-CoV-2 infection associated with disease severity and outcome. *Sci*  
11 *Immunol* 2020;**5**.  
12  
13 17 Wang H, Yuan Y, Xiao M, *et al.* Dynamics of the SARS-CoV-2 antibody response up  
14 to 10 months after infection. *Cell Mol Immunol* 2021;:1–3.  
15  
16 18 Perreault J, Tremblay T, Fournier M-J, *et al.* Waning of SARS-CoV-2 RBD antibodies  
17 in longitudinal convalescent plasma samples within 4 months after symptom onset.  
18 *Blood* 2020;**136**:2588.  
19  
20 19 Malsagova K, Kopylov A, Stepanov A, *et al.* Biobanks—A Platform for Scientific and  
21 Biomedical Research. *Diagnostics* 2020;**10**:485.  
22  
23 20 Allen C, Joly Y, Moreno PG. Data sharing, biobanks and informed consent: a research  
24 paradox. *McGill JL Health* 2013;**7**:85.  
25  
26 21 Caulfield T, Murdoch B. Genes, cells, and biobanks: Yes, there’s still a consent  
27 problem. *PLoS Biol* 2017;**15**:e2002654.  
28  
29 22 Tremblay K, Rousseau S, Zawati MH, *et al.* The Biobanque québécoise de la COVID-  
30 19 (BQC19)—A cohort to prospectively study the clinical and biological determinants  
31 of COVID-19 clinical trajectories. *PloS One* 2021;**16**:e0245031.  
32  
33 23 O’Brien SF, Lieshout-Krikke RW, Lewin A, *et al.* Research initiatives of blood  
34 services worldwide in response to the covid-19 pandemic. *Vox Sang* 2021;**116**:296–  
35 304.  
36  
37 24 Institut national de santé publique du Québec. Données de vaccination contre la  
38 COVID-19 au Québec. 2021. <https://www.inspq.qc.ca/covid-19/donnees/vaccination>  
39 (accessed 17 Nov 2021).  
40  
41 25 Tazuin A, Gong SY, Beaudoin-Bussièrès G, *et al.* Strong humoral immune responses  
42 against SARS-CoV-2 Spike after BNT162b2 mRNA vaccination with a 16-week  
43 interval between doses. *Cell Host Microbe* 2021.  
44  
45 26 Whitcombe AL, McGregor R, Craigie A, *et al.* Comprehensive analysis of SARS-  
46 CoV-2 antibody dynamics in New Zealand. *Clin Transl Immunol* 2021;**10**.  
47 doi:10.1002/cti2.1261  
48  
49  
50  
51  
52  
53  
54  
55  
56  
57  
58  
59  
60

- 1  
2  
3 27 Ripperger TJ, Uhrlaub JL, Watanabe M, *et al.* Orthogonal SARS-CoV-2 serological  
4 assays enable surveillance of low-prevalence communities and reveal durable humoral  
5 immunity. *Immunity* 2020;**53**:925-933. e4.  
6  
7  
8 28 Cohen KW, Linderman SI, Moodie Z, *et al.* Longitudinal analysis shows durable and  
9 broad immune memory after SARS-CoV-2 infection with persisting antibody  
10 responses and memory B and T cells. *Cell Rep Med* 2021;**2**:100354.  
11 doi:10.1016/j.xcrm.2021.100354  
12  
13 29 Bégin P, Callum J, Heddle NM, *et al.* Convalescent plasma for adults with acute  
14 COVID-19 respiratory illness (CONCOR-1): study protocol for an international,  
15 multicentre, randomized, open-label trial. *Trials* 2021;**22**:1–17.  
16  
17  
18  
19  
20  
21  
22  
23  
24  
25  
26  
27  
28  
29  
30  
31  
32  
33  
34  
35  
36  
37  
38  
39  
40  
41  
42  
43  
44  
45  
46  
47  
48  
49  
50  
51  
52  
53  
54  
55  
56  
57  
58  
59  
60

1  
2  
3 **Figure caption**  
4  
5

6 **Figure 1.** Average number of days between donations as a function of the number of  
7 donations in PlasCoV.  
8  
9

10  
11  
12  
13  
14  
15  
16  
17  
18  
19  
20  
21  
22  
23  
24  
25  
26  
27  
28  
29  
30  
31  
32  
33  
34  
35  
36  
37  
38  
39  
40  
41  
42  
43  
44  
45  
46  
47  
48  
49  
50  
51  
52  
53  
54  
55  
56  
57  
58  
59  
60

For peer review only

1  
2  
3  
4  
5  
6  
7  
8  
9  
10  
11  
12  
13  
14  
15  
16  
17  
18  
19  
20  
21  
22  
23  
24  
25  
26  
27  
28  
29  
30  
31  
32  
33  
34  
35  
36  
37  
38  
39

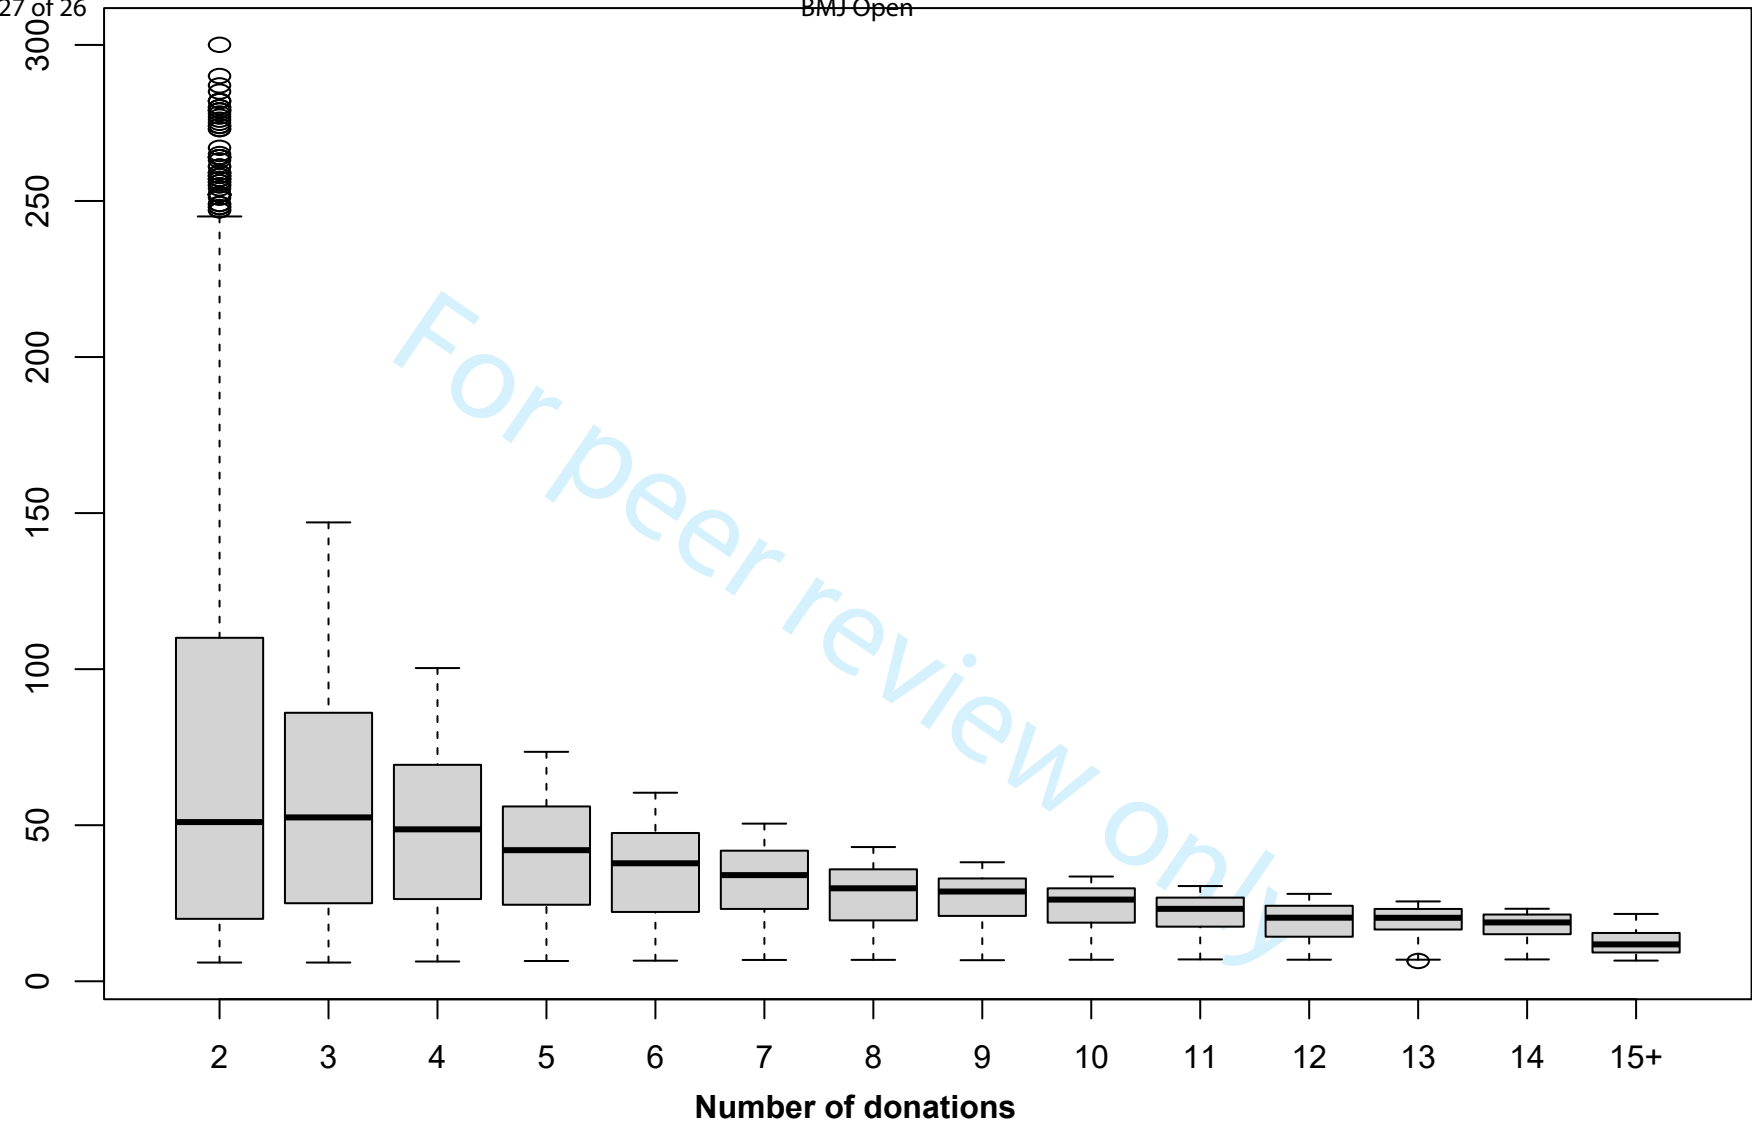

For peer review only

|                       |              |              |              |            |            |            |            |            |            |            |            |            |            |              |
|-----------------------|--------------|--------------|--------------|------------|------------|------------|------------|------------|------------|------------|------------|------------|------------|--------------|
| <b>Donors (N)</b>     | <b>2,498</b> | <b>1,505</b> | <b>1,045</b> | <b>758</b> | <b>567</b> | <b>441</b> | <b>344</b> | <b>355</b> | <b>274</b> | <b>209</b> | <b>177</b> | <b>187</b> | <b>165</b> | <b>1,631</b> |
| <b>Proportion (%)</b> | <b>16.1</b>  | <b>9.7</b>   | <b>6.7</b>   | <b>4.9</b> | <b>3.7</b> | <b>2.8</b> | <b>2.2</b> | <b>2.3</b> | <b>1.8</b> | <b>1.3</b> | <b>1.1</b> | <b>1.2</b> | <b>1.1</b> | <b>10.5</b>  |

# BMJ Open

## Cohort profile: A Québec-based plasma donor biobank to study COVID-19 immunity (PlasCoV)

|                                 |                                                                                                                                                                                                                                                          |
|---------------------------------|----------------------------------------------------------------------------------------------------------------------------------------------------------------------------------------------------------------------------------------------------------|
| Journal:                        | <i>BMJ Open</i>                                                                                                                                                                                                                                          |
| Manuscript ID                   | bmjopen-2022-068803.R2                                                                                                                                                                                                                                   |
| Article Type:                   | Cohort profile                                                                                                                                                                                                                                           |
| Date Submitted by the Author:   | 30-Jan-2023                                                                                                                                                                                                                                              |
| Complete List of Authors:       | Germain, Marc; Héma-Québec<br>Lewin, Antoine; Héma-Québec,<br>Bazin, Renée; Héma-Québec<br>Dieudé, Mélanie; Héma-Québec<br>Perreault, Josée; Héma-Québec<br>Boivin, Amélie; Héma-Québec<br>Grégoire, Yves; Héma-Québec<br>Renaud, Christian; Héma-Québec |
| <b>Primary Subject Heading</b>: | Public health                                                                                                                                                                                                                                            |
| Secondary Subject Heading:      | Infectious diseases, Immunology (including allergy), Public health                                                                                                                                                                                       |
| Keywords:                       | Blood bank & transfusion medicine < HAEMATOLOGY, Public health < INFECTIOUS DISEASES, COVID-19                                                                                                                                                           |
|                                 |                                                                                                                                                                                                                                                          |

SCHOLARONE™  
Manuscripts



I, the Submitting Author has the right to grant and does grant on behalf of all authors of the Work (as defined in the below author licence), an exclusive licence and/or a non-exclusive licence for contributions from authors who are: i) UK Crown employees; ii) where BMJ has agreed a CC-BY licence shall apply, and/or iii) in accordance with the terms applicable for US Federal Government officers or employees acting as part of their official duties; on a worldwide, perpetual, irrevocable, royalty-free basis to BMJ Publishing Group Ltd ("BMJ") its licensees and where the relevant Journal is co-owned by BMJ to the co-owners of the Journal, to publish the Work in this journal and any other BMJ products and to exploit all rights, as set out in our [licence](#).

The Submitting Author accepts and understands that any supply made under these terms is made by BMJ to the Submitting Author unless you are acting as an employee on behalf of your employer or a postgraduate student of an affiliated institution which is paying any applicable article publishing charge ("APC") for Open Access articles. Where the Submitting Author wishes to make the Work available on an Open Access basis (and intends to pay the relevant APC), the terms of reuse of such Open Access shall be governed by a Creative Commons licence – details of these licences and which [Creative Commons](#) licence will apply to this Work are set out in our licence referred to above.

Other than as permitted in any relevant BMJ Author's Self Archiving Policies, I confirm this Work has not been accepted for publication elsewhere, is not being considered for publication elsewhere and does not duplicate material already published. I confirm all authors consent to publication of this Work and authorise the granting of this licence.



1  
2  
3 **Cohort profile: A Québec-based plasma donor biobank**  
4  
5 **to study COVID-19 immunity (PlasCoV)**  
6  
7

8 Marc Germain<sup>1\*</sup>, Antoine Lewin<sup>1</sup>, Renée Bazin<sup>1</sup>, Mélanie Dieudé<sup>1</sup>, Josée Perreault<sup>1</sup>,  
9  
10 Amélie Boivin<sup>1</sup>, Yves Grégoire<sup>1</sup>, Christian Renaud<sup>1</sup>  
11  
12

13  
14 <sup>1</sup> Medical Affairs and Innovation, Héma-Québec, Montréal and Québec, Canada  
15  
16

17  
18  
19 **Corresponding author:**  
20

21 Dr. Marc Germain, MD, PhD, FRCP(C)  
22

23 Vice-President, Medical Affairs and Innovation  
24

25 Héma-Québec  
26

27 1070 avenue des Sciences-de-la-Vie, Québec, QC G1V 5C3, Canada  
28

29 Phone: 1-418 780-4362  
30

31 E-mail: [marc.germain@hema-quebec.qc.ca](mailto:marc.germain@hema-quebec.qc.ca)  
32  
33

34  
35  
36  
37 **Word count:** 2,603

38  
39 **References:** 29

40  
41 **Tables and Figures:** 4  
42  
43  
44  
45  
46  
47  
48  
49  
50  
51  
52  
53  
54  
55  
56  
57  
58  
59  
60

## Abstract

### *Purpose*

The long-term humoral immunity to COVID-19 is not well understood owing to the continuous emergence of new variants of concern, the evolving vaccine- and infection-induced immunity, and the limited duration of follow-up in previous studies. As the sole blood service in Québec (Canada), we established a COVID-19-focused biobank (“PlasCoV”) in April 2021.

### *Participants*

As of January 2022, the biobank included 86,229 plasma samples from 15,502 regular donors (age range=18–84 years, females=49.7%), for an average of 5.6 donations per donor. Nearly two thirds (65.6%) of biobank donors made at least two donations, with many donors having provided samples pre- and post-vaccination (3061 [19.8%]) or pre- and post-infection (131 [0.9%]), thus allowing for longitudinal studies on vaccine- and infection-induced immunity.

### *Findings to date*

A study that used PlasCoV samples revealed that previously infected individuals who received a single dose of the BNT162b2 COVID-19 vaccine exhibited the strongest immune response. By contrast, SARS-CoV-2-naïve individuals required two vaccine doses to produce a maximal immune response. Furthermore, the results of a four-phase seroprevalence study indicated that the anti-nucleocapsid (N) response wanes rapidly, so that up to one third of previously infected donors were seronegative for anti-N.

### *Future plans*

Donations from individuals who consented to participate before October 1, 2022 will be collected up until March 31, 2023. This plasma biobank will facilitate the conduct of longitudinal studies on COVID-19 immunity, thus helping to provide valuable insights into the anti-SARS-CoV-2 immune response and its persistence, and the effects of vaccination and variants on the specificity of the anti-SARS-CoV-2 immune response.

### Strengths and limitations

- To the best of our knowledge, this would be the largest biobank of plasma samples dedicated to COVID-19 research, with >80,000 samples from >15,000 donors; new samples will continue to be added until March 2023.
- Furthermore, the large subset of donors with  $\geq 2$  samples (i.e., 65.6%) — along with the high frequency of donations in this subset (i.e., median: once every 29.0 days) — enables the conduct of longitudinal analyses on COVID-19 immunity.
- The cost of establishing the biobank was minimized since the infrastructure and personnel required for sample collection were already in place at our blood collection sites.
- Only plasma samples are available, such that the biobank cannot be used to study cell-mediated immunity.
- Despite the large sample, the plasma donor population is not fully representative of the overall Québec population, as expected since plasma donors typically reflect the healthy adult population.

## Introduction

Despite remarkable progress, our understanding of the long-term, humoral immunity to COVID-19 is incomplete owing to a number of challenges. The emergence of new variants of concern, such as Omicron, continuously challenges prior assumptions and data on the effectiveness and persistence of COVID-19 immunity [1,2]. Furthermore, amid mass vaccination, disentangling infection from vaccine-induced antibodies to SARS-CoV-2 has become increasingly difficult to inform public health authorities [3–5]. Notably, the vast majority of published serological studies used a cross-sectional design, and hence do not provide longitudinally collected data on COVID-19 immunity [6]. Lastly, the more limited number of longitudinal studies that have been conducted had follow-up periods <12 months [7–18] and lacked long-term funding commitment. Clearly, new initiatives are needed to overcome these barriers.

Historically, biobanks have spurred research efforts on novel or rare diseases [19] and would likely help address the aforementioned challenges for COVID-19 research. They do so using highly standardized, quality-controlled processes to analyze a large number of biological specimens which are made available to the research community. In addition, biobanks are subject to regulatory oversight to protect donors' rights. Virtually all biobanks collect a “broad” consent that allows for samples to be used for multiple research purposes [20]. For researchers, this practice (while controversial [21]) alleviates the burden associated with seeking consent.

However, existing COVID-19-focused biobanks are suboptimal to longitudinally study COVID-19 immunity. The *Biobanque québécoise de la COVID-19* (BCQ19) is a

1  
2  
3 biobanking initiative in Québec (Canada) that includes blood samples from individuals  
4 with a negative (controls) or positive SARS-CoV-2 PCR test result, with samples collected  
5 at several fixed time points for up to 24 months post-diagnosis (for non-hospitalized  
6 individuals) or post-hospitalization (for hospitalized individuals) [22]. However, BCQ19  
7 is limited in terms of sample size and population representativeness. Furthermore, the  
8 unavailability of samples prior to diagnosis or hospitalization hinders the study of the early  
9 immune response to COVID-19.  
10  
11  
12  
13  
14  
15  
16  
17  
18  
19

20 Blood services such as our institution (Héma-Québec – the only blood service operating in  
21 Québec) are ideally positioned to establish a biobank that would complement BCQ19 or  
22 other COVID-19-focused biobanks and better address researchers' needs. Indeed, blood  
23 services routinely collect biological specimens from donors in the general population,  
24 thereby substantially alleviating the high cost normally associated with the establishment  
25 of a biobank. Blood services have been key partners in conducting COVID-19 research  
26 since the beginning of the pandemic [23]; involving them in biobanking efforts is therefore  
27 a sound approach to fuel additional research on COVID-19 immunity.  
28  
29  
30  
31  
32  
33  
34  
35  
36  
37  
38

39 Here, we report on the establishment of a new biobank dedicated to COVID-19 research to  
40 inform public health in the province of Québec (Canada). The biobank consists of regular  
41 plasma donations collected throughout Québec, hence the name 'PlasCoV'. Because  
42 plasma donors can donate every 6 days at our institution, the biobank includes a large  
43 number of repeat donors for whom longitudinal analyses are feasible.  
44  
45  
46  
47  
48  
49  
50  
51  
52  
53  
54  
55  
56  
57  
58  
59  
60

## Cohort description

### *Cohort establishment and overview*

The project was initiated on February 23, 2021. A pilot phase was launched in March 2021, and the project was expanded to all of our fixed collection centers in April 2021. At that time, the majority of the Québec general population was unvaccinated [24], which enabled us to collect samples pre- and post-vaccination for many donors.

Ten fixed blood centers — all located in large or medium size ( $\geq 100,000$  population) areas — were designated to collect biobank-dedicated samples (**Table 1**). The resulting donor cohort is therefore broadly representative of plasma donors living in urban and suburban areas throughout Québec.

**Table 1. Number of samples collected by each blood center as of January 24, 2022.**

| Center name                    | Metropolitan area | Health region (#-name)          | Samples collected, N (%) |        |
|--------------------------------|-------------------|---------------------------------|--------------------------|--------|
| Globule - Centre Laval         | Montréal          | 13-Laval                        | 3909                     | (4.1)  |
| Globule - Kirkland             | Montréal          | 06-Montréal                     | 2574                     | (2.7)  |
| Globule - Quartier Dix30       | Montréal          | 16-Montérégie                   | 5134                     | (5.4)  |
| Globule - Place Versailles     | Montréal          | 06-Montréal                     | 3205                     | (3.3)  |
| Globule - Quartier Lebourgneuf | Québec city       | 03-Capitale Nationale           | 11260                    | (11.7) |
| Globule - Sainte-Foy           | Québec city       | 03-Capitale Nationale           | 11391                    | (11.9) |
| Plasmavie - Gatineau           | Gatineau          | 08-Outaouais                    | 11878                    | (12.4) |
| Plasmavie - Saguenay           | Saguenay          | 02-Saguenay-Lac-St-Jean         | 17325                    | (18.1) |
| Plasmavie - Sherbrooke         | Sherbrooke        | 05-Estrie                       | 16669                    | (17.4) |
| Plasmavie - Trois-Rivières     | Trois-Rivières    | 04-Mauricie et Centre du Québec | 12627                    | (13.2) |

The biobank includes samples from a population-based cohort of healthy, voluntary, non-remunerated donors of plasma for fractionation who consented that their samples be used for research purposes. Specifically, the pre-donation questionnaire asks donors if they are willing to give part of their routine donation for research purposes. A donor's consent is considered valid for all donations, and so those who consent are not asked this question at subsequent donations. [A donor can decide at any time, simply by giving verbal notice, to](#)

1  
2  
3 [withdraw his/her consent for the use of his/her samples and data.](#) A 3 ml sample is collected  
4  
5 from the plasma bag and frozen for biobanking, and aliquots of 200 µL to 500 µL of the  
6  
7 thawed, biobanked sample can be provided upon request (so that each sample can be used  
8  
9 to prepare at least 6 aliquots upon thawing).  
10  
11

### 12 13 *Variables*

14  
15  
16 In addition to plasma samples, the biobank offers access to several variables that are  
17  
18 collected as part of routine donor screening or linked to government registries. Variables  
19  
20 collected as part of routine blood donation include demographic characteristics (e.g., age,  
21  
22 sex) and clinical characteristics (e.g., blood type, recent blood-borne infections, diabetes),  
23  
24 which (except for blood type) are all self-reported by the donor (**Table 2**). Data on COVID-  
25  
26 19 vaccination were obtained by linking in-house donor data with the *Système*  
27  
28 *d'information pour la protection des maladies infectieuses* (SI-PMI) — a government  
29  
30 registry that captures all COVID-19 vaccinations covered by the universal, public health  
31  
32 insurance in Québec (i.e., by the *Régie de l'assurance maladie du Québec*). Similarly, data  
33  
34 on COVID-19 infections were obtained by linking in-house data with the *Trajectoire de*  
35  
36 *Santé Publique* (TSP) — a government registry that captures data on SARS-CoV-2  
37  
38 infections detected by PCR tests performed on nasopharyngeal swabs. These tests were  
39  
40 freely available to anyone experiencing COVID-19-related symptoms at the beginning of  
41  
42 the pandemic, but have been restricted to priority groups (i.e., primarily health care workers  
43  
44 and individuals aged  $\geq 70$ ) since January 5, 2022. If needed, additional variables (e.g., as  
45  
46 tobacco use, medication use, and occupational status) can be obtained through a  
47  
48 supplemental questionnaire filled by donors during their donation.  
49  
50  
51  
52  
53  
54  
55  
56  
57  
58  
59  
60



**Table 2. Summary of the main variables\* collected or derived from the cohort.**

| Variables                                                     | Information collected before vaccination/infection | Information collected after vaccination/infection | Information routinely collected at pre-donation screening |
|---------------------------------------------------------------|----------------------------------------------------|---------------------------------------------------|-----------------------------------------------------------|
| <b>Internal Data</b>                                          |                                                    |                                                   |                                                           |
| <b>Donor questionnaire</b>                                    |                                                    |                                                   |                                                           |
| Demographics: Age/Sex/Health region/Ethnicity                 | X                                                  | X                                                 | X                                                         |
| BMI calculated with                                           | X                                                  | X                                                 | X                                                         |
| Height                                                        | X                                                  | X                                                 | X                                                         |
| Weight                                                        | X                                                  | X                                                 | X                                                         |
| Blood pressure <sup>1</sup>                                   | X                                                  |                                                   |                                                           |
| Diabetes profile and treatment (without insulin) <sup>2</sup> | X                                                  | X                                                 | X                                                         |
| COVID-19 vaccination status <sup>3</sup>                      | X                                                  | X                                                 | X                                                         |
| History of PCR-confirmed infection <sup>4</sup>               | X                                                  | X                                                 | X                                                         |
| <b>Laboratory tests</b>                                       |                                                    |                                                   |                                                           |
| Hemoglobin level                                              | X                                                  | X                                                 | X                                                         |
| Blood type (ABO and Rh genotype or phenotype)                 | X                                                  | X                                                 | X                                                         |
| <b>External Data</b>                                          |                                                    |                                                   |                                                           |
| COVID-19 vaccination status <sup>5</sup>                      | X                                                  | X                                                 | X                                                         |
| History of PCR-detected infection <sup>6</sup>                | X                                                  | X                                                 | X                                                         |

**Abbreviation:** COVID-19 = coronavirus disease-19

**Notes:**

- \* Several other variables such as donor deferrals, infectious state, etc. are routinely collected but are not presented in this table.
- 1. Available only for a subset of blood donor before the COVID-19 pandemic.
- 2. Diabetes treated with insulin is an exclusion criterion for blood donation.
- 3. Reported by the donor.
- 4. Reported by the donor.

- 1
  - 2
  - 3
  - 4
  - 5
  - 6
  - 7
  - 8
  - 9
  - 10
  - 11
  - 12
  - 13
  - 14
  - 15
  - 16
  - 17
  - 18
  - 19
  - 20
  - 21
  - 22
  - 23
  - 24
  - 25
  - 26
  - 27
  - 28
  - 29
  - 30
  - 31
  - 32
  - 33
  - 34
  - 35
  - 36
  - 37
  - 38
  - 39
  - 40
  - 41
  - 42
  - 43
  - 44
  - 45
  - 46
  - 47
- 5. From the provincial vaccination registry *Système d'information pour la protection des maladies infectieuses (SI-PMI)*.
  - 6. From the provincial COVID-19 infection registry *Trajectoire de Santé Publique – TSP*.

For peer review only

### *Participant characteristics*

As of January 24, 2022, 15,502 out of 17,070 (90.8%) donors consented to have a small volume of their donations used for research on COVID-19 (**Table 3**). No donor recruitment campaign was specifically undertaken for this research initiative. The recruitment of new donors ended on October 1, 2022; however, donations from individuals who consented to participate before October 1, 2022 will be collected up until March 31, 2023.

Donor characteristics were assessed as of January 24, 2022. Among consenting donors, median age was 43.0 years (**Table 3**). The six health regions where donors most often lived were Capitale-Nationale (18.1%), Estrie (14.7%), Saguenay-Lac-Saint-Jean (14.4%), Mauricie et Centre-du-Québec (11.4%), Outaouais (11.2%), and Montréal (9.8%). The cohort predominantly included donors who self-identified as white (93.6%). Relative to non-consenting donors, consenting donors tended to be younger (i.e., median age: 43.0 vs. 48.0 years), and included slightly more female donors (i.e., 49.7% vs. 46.3%) and more residents of urban areas (e.g., Montreal-Laval region: 12.1% vs. 8.1%). Relative to the Québec general population, consenting donors had a similar age and sex distribution, but the densely populated region of Montreal-Laval was underrepresented (12.1% vs. 29.5%).

A key feature of this biobank is the availability of multiple, longitudinally collected plasma samples and associated data. As of January 24, 2022, the biobank had collected 86,229 samples from 15,502 donors, for an average of 5.6 donations per donor. At least two donations are available for nearly two thirds of the cohort (i.e., 65.6%), thereby enabling the conduct of longitudinal analyses (**Figure 1**). Most of these repeat donors appeared to donate regularly, with a median gap between donations ranging from 51.0 days for those

1  
2  
3 with 2 donations to 11.8 days for those with  $\geq 15$  donations (median=29.0 days among those  
4  
5 with  $\geq 2$  donations; **Figure 1**).

6  
7  
8 The cohort includes 3061 donors with samples collected pre- and post-vaccination, thereby  
9  
10 enabling the study of vaccine-induced immunity in a real-world population of vaccine-  
11  
12 naïve individuals. The cohort also includes 10,551 donors with samples collected only  
13  
14 post-vaccination. Finally, the cohort includes 1326 donors with sample collected only pre-  
15  
16 vaccination and 564 donors with no vaccination history or missing information.

17  
18  
19 The vast majority (i.e., 96.4%) of donors had received  $\geq 1$  vaccine dose, and 95.7% had  
20  
21 received  $\geq 2$  doses; only 1.6% were unvaccinated. In Québec, the second vaccine dose was  
22  
23 delayed for up to 16 weeks to optimize population-level immunity amid concerns over  
24  
25 limited vaccine supply. As a result, a large proportion of plasma donors (i.e., 14.6%)  
26  
27 received their second dose 85-112 days after their first dose, but some received it within  
28  
29 the  $\square 3$ -week gap recommended by the manufacturer (i.e., 1.9% within 4 weeks). This  
30  
31 notable feature of our biobank may be used to study the impact of vaccine dose intervals  
32  
33 on the immune response, as done by Tauzin et al. [25] (described in more details further  
34  
35 down).

36  
37  
38 The following vaccines have been administered in Québec: ChAdOx1-S, BNT162b2, and  
39  
40 mRNA-1273. Some individuals have received combinations of these vaccines, which was  
41  
42 allowed by public health authorities to help fast-track the vaccination campaign.

43  
44  
45 Overall, 1662 (10.7%) donors had a documented infection as of January 24, 2022 (**Table**  
46  
47 **3**), including 131 (7.9%) donors with available samples before and after a documented  
48  
49 infection. This seemingly low number of donors who contracted SARS-CoV-2 between  
50  
51  
52  
53  
54  
55  
56  
57  
58  
59  
60

1  
2  
3 two donations is largely driven by the low number of at-risk patients (i.e., either because  
4 they donated only once [N=712 (42.8%)], or because the timing of their infection left little  
5  
6 time for a donation before January 24, 2022).  
7  
8  
9  
10  
11  
12  
13  
14  
15  
16  
17  
18  
19  
20  
21  
22  
23  
24  
25  
26  
27  
28  
29  
30  
31  
32  
33  
34  
35  
36  
37  
38  
39  
40  
41  
42  
43  
44  
45  
46  
47  
48  
49  
50  
51  
52  
53  
54  
55  
56  
57  
58  
59  
60

| <b>Table 3. Donor characteristics as of January 24, 2022.</b> | <b>Consenting donors (N=15,502)</b> |        | <b>Non-consenting donors (N=1568)</b> |                      | <b>General, adult population<sup>1</sup></b> |
|---------------------------------------------------------------|-------------------------------------|--------|---------------------------------------|----------------------|----------------------------------------------|
| <b>Sex,<sup>2</sup> n (%)</b>                                 |                                     |        |                                       |                      |                                              |
| Female                                                        | 7709                                | (49.7) | 831                                   | (46.3)               | (50.2)                                       |
| <b>Age (years),<sup>2,3</sup> mean ± SD (median)</b>          | 43.9 ± 16.8 (43.0)                  |        | 46.1 ± 16.7 (48.0)                    |                      | 50.2 ± 18.8 (50.0)                           |
| <b>Age (years),<sup>2,3</sup> n (%)</b>                       |                                     |        |                                       |                      |                                              |
| 18-29                                                         | 4399                                | (28.4) | 433                                   | (24.1)               | (17.1)                                       |
| 30-39                                                         | 2556                                | (16.5) | 269                                   | (15)                 | (16.0)                                       |
| 40-49                                                         | 2287                                | (14.8) | 251                                   | (14)                 | (16.1)                                       |
| 50-59                                                         | 2440                                | (15.7) | 335                                   | (18.7)               | (16.1)                                       |
| 60-70                                                         | 3178                                | (20.5) | 408                                   | (22.7)               | (18.3)                                       |
| ≥71                                                           | 642                                 | (4.1)  | 100                                   | (5.6)                | (16.4)                                       |
| <b>Self-reported race/ethnicity,<sup>2,4</sup> n (%)</b>      |                                     |        |                                       |                      |                                              |
| White                                                         | 14517                               | (93.6) | 1667                                  | (92.8)               | NA                                           |
| Other                                                         | 985                                 | (6.4)  | 129                                   | (7.2)                | NA                                           |
| <b>Health region (#-name),<sup>2,3</sup> n (%)</b>            |                                     |        |                                       |                      |                                              |
| 02-Saguenay-Lac-Saint-Jean                                    | 2234                                | (14.4) | 299                                   | (16.6)               | (3.3)                                        |
| 03-Capitale-Nationale                                         | 2811                                | (18.1) | 351                                   | (19.5)               | (9.0)                                        |
| 04-Mauricie et Centre-du-Québec                               | 1771                                | (11.4) | 213                                   | (11.9)               | (6.2)                                        |
| 05-Estrie                                                     | 2282                                | (14.7) | 277                                   | (15.4)               | (5.8)                                        |
| 06-Montréal                                                   | 1518                                | (9.8)  | 103                                   | (5.7)                | (24.4)                                       |
| 07-Outaouais                                                  | 1729                                | (11.2) | 263                                   | (14.6)               | (4.6)                                        |
| 12-Chaudière-Appalaches                                       | 744                                 | (4.8)  | 100                                   | (5.6)                | (5.0)                                        |
| 13-Laval                                                      | 353                                 | (2.3)  | 24                                    | (1.3)                | (5.1)                                        |
| 14-Lanaudière                                                 | 252                                 | (1.6)  | 18                                    | (1)                  | (6.0)                                        |
| 15-Laurentides                                                | 333                                 | (2.1)  | 22                                    | (1.2)                | (7.4)                                        |
| 16-Montérégie                                                 | 1259                                | (8.1)  | 108                                   | (6)                  | (16.6)                                       |
| Regions without fixed centers <sup>4</sup>                    | 126                                 | (0.8)  | <11                                   | (<0.70) <sup>5</sup> | (6.4)                                        |
| Unknown or outside Québec                                     | 90                                  | (0.6)  | <11                                   | (<0.70) <sup>5</sup> | NA                                           |
| <b>Number of vaccine doses received,<sup>2,6</sup> n (%)</b>  |                                     |        |                                       |                      |                                              |
| 0                                                             | 254                                 | (1.6)  | NA                                    | NA                   |                                              |
| 1                                                             | 103                                 | (0.7)  | NA                                    | NA                   | (91.6)                                       |
| 2                                                             | 5275                                | (34.0) | NA                                    | NA                   | (88.7)                                       |
| >2                                                            | 9561                                | (61.7) | NA                                    | NA                   | (47.1)                                       |
| Missing data <sup>7</sup>                                     | 309                                 | (2.0)  | NA                                    | NA                   | NA                                           |

| <b>Documented COVID-19 infection,<sup>2,6,8</sup> n (%)</b> |       |        |    |    |        |
|-------------------------------------------------------------|-------|--------|----|----|--------|
| Yes                                                         | 1662  | (10.7) | NA | NA | (5.6)  |
| No                                                          | 13531 | (87.3) | NA | NA | (94.4) |
| Missing data <sup>7</sup>                                   | 309   | (2.0)  | NA | NA | NA     |

**Abbreviations:** COVID-19 = coronavirus disease-19; SD = standard deviation

#### Notes:

1. For the general population of Québec, various data sources were used to capture variables of interest.
2. Demographics (i.e., sex, age, self-reported ethnicity, and health region) are reported as of 01-24-2022. Data on prior vaccination and documented infection are reported as of 01-24-2022.
3. For the general population, data come from the following: Ministère de la Santé et des Services sociaux du Québec. Estimations et projections de population par territoire sociosanitaire. Available from: <https://publications.msss.gouv.qc.ca/msss/document-001617/>. Accessed on August 10, 2022.
4. Includes (01-Bas-Saint-Laurent, 08-Abitibi-Témiscamingue, 09-Côte-Nord, 10-Nord-du-Québec, 11-Gaspésie-Îles-de-la-Madeleine, 17-Nunavik).
5. The exact number is lower than 11 and is thus not reported to preserve donor anonymity.
6. For the general population, data come from the following: Institut national de santé publique du Québec. Données COVID-19 par âge et sexe - Évolution des cas. Available from: <https://www.inspq.qc.ca/covid-19/donnees/age-sexe/evolution-cas>. Accessed on 03-01-2022."
7. Missing data are due to mismatches between donor information recorded in our institution's database and that recorded in governmental databases (N=309).
8. Data for the general population are underestimated since the age groups used in publicly available data (see footnote 7) exclude individuals aged 18-19 years.

#### *Funding*

The project is entirely funded by the COVID-19 Immunity Task Force (CITF), a government-funded working group dedicated to advancing knowledge and research on COVID-19 in Canada and to inform public health authorities. CITF has provided a long-term funding commitment (i.e., 2 years) for this biobank project, which will enable the conduct of long-term studies on infection- and vaccine-induced immunity to COVID-19.

#### **Patient and Public Involvement**

Patients or the public were not involved in the design, or conduct, or reporting, or dissemination plans of our research

## Findings to Date

### *Longitudinal assessment of COVID-19 immunity*

A study by Tauzin et al. used samples from our biobank to study the immune response to the mRNA vaccine BNT162b2 among SARS-CoV-2-naïve and previously infected individuals [25]. The authors found that, in previously infected individuals, the immune response was strengthened after the first dose of vaccine and minimally declined thereafter. The administration of a second dose did not further increase the strength of the immune response. By contrast, in SARS-CoV-2-naïve individuals, the administration of a second dose further strengthened the immune response (except for antibody-mediated cell cytotoxicity [ADCC], which appeared more transient).

Tauzin et al. additionally investigated the impact of using an extended interval between the two vaccine doses in SARS-CoV-2-naïve individuals. With the exception of ADCC, all assays were consistent with a better immune response when administering the two doses ~16 weeks apart compared with ~4 weeks apart.

### *Serosurvey*

A publicly available report from our institution used biobank samples to estimate the seroprevalence of anti-SARS-CoV-2 antibodies in Québec from June 2021 – July 2021 [3]. This was the third phase of a serosurvey initiated in May 2020. Phases 1 (May–June 2020) and 2 (January–March 2021) only included whole blood donors rather than plasma donors from the biobank, since the PlasCoV project had not yet been launched. Phase 3 assessed both anti-receptor binding domain (RBD) and anti-nucleocapsid (N) seroprevalence, since



1  
2  
3 >80% of the population had received at least one vaccine dose at the time of the serosurvey  
4  
5 [24].  
6  
7

8 The anti-RBD seroprevalence was 89.6%, consistent with the widespread vaccination  
9 coverage during phase 3. However, the anti-N seroprevalence was only 6.4%, which was  
10 lower than the anti-RBD seroprevalence among unvaccinated blood donors included in  
11 phase 2 (i.e., 10.5%). This unexpected result was likely driven by seroreversion, which  
12 occurs faster for anti-N than anti-spike (or anti-RBD) antibodies [26–28]. Indeed, nearly  
13 40% of previously infected donors in phase 3 were seronegative for anti-N, likely because  
14 of seroreversion. This apparent rapid waning of anti-N antibodies was also observed in a  
15 separate cohort of 54 previously infected donors of convalescent plasma used in the  
16 CONCOR-1 clinical trial [29]. After more than 200 days of follow-up, anti-N seroreversion  
17 occurred in 33.3% of these donors, whereas anti-RBD seroreversion occurred in only  
18 11.1% of donors.  
19  
20  
21  
22  
23  
24  
25  
26  
27  
28  
29  
30  
31  
32  
33

34 Taken together, these results suggest anti-N seroprevalence may only be adequate to  
35 capture relatively recent infections, thereby questioning its usefulness in serosurveys  
36 analyzed using conventional analytical approaches (i.e., using a hard threshold applied at  
37 a single time point to determine seropositivity) [5]. At the time of writing this manuscript,  
38 the fourth phase of this study is underway and uses PlasCoV samples to compare anti-N  
39 responses pre- and post-infection — a new approach to estimate the incidence of recent  
40 infections in the context of the Omicron wave.  
41  
42  
43  
44  
45  
46  
47  
48  
49  
50  
51  
52  
53  
54  
55  
56  
57  
58  
59  
60

## Future plans

The herein described plasma biobank will help conduct longitudinal studies on COVID-19 immunity. The resulting evidence will provide valuable insights on several aspects of the immune response to COVID-19, including its persistence, its specificity against variants, and the effects of vaccination.

Future studies using this biobank are already planned or underway. Our organization will continue using PlasCoV samples for an ongoing anti-SARS-CoV-2 serosurvey up until March, 2023 (see above description). The biobank will also prove useful to address other research questions in public health such as hybrid immunity, response to emerging variants or new vaccine formulations. For example, another study will soon be conducted to estimate the impact of post-COVID-19 syndrome (a.k.a., long COVID) in a healthy, adult population using this large, prospective longitudinal cohort.

## Strengths and limitations

The herein described biobank has several strengths. To the best of our knowledge, this would be the largest biobank of plasma samples dedicated to COVID-19 research, with >80,000 samples from >15,000 donors and new samples continually being added until March 2023. Furthermore, the large subset of donors with  $\geq 2$  samples (65.6%) — along with the high frequency of donations in this subset (i.e., median: once every 29.0 days) — enables the conduct of longitudinal analyses on COVID-19 immunity. Another strength is that donors provided a broad consent, which allows researchers to recontact them for other projects (e.g., supplemental questionnaire). Lastly, the cost of establishing the biobank was minimized since the infrastructure and personnel required for sample collection were

1  
2  
3 already in place at our blood collection sites. Given these strengths, our biobank may serve  
4  
5 as a model for other blood operators and government partners who would be interested in  
6  
7 reproducing our initiative elsewhere.  
8  
9

10  
11 Certain limitations should nonetheless be considered when using our biobank samples. To  
12  
13 begin, the large number of samples is made possible in part because donors are free to  
14  
15 donate whenever they want, i.e., they did not agree to participate in a research that involves  
16  
17 a rigid protocol with scheduled visits. As a result, samples are not collected systematically  
18  
19 after an event of interest, such as vaccination or infection, although the large number of  
20  
21 samples as well as the participation of frequent donors who provide samples on a regular  
22  
23 basis thereby increasing the likelihood of having samples within a reasonable time frame  
24  
25 relative to vaccination or infection, mitigate this limitation. Furthermore, only plasma  
26  
27 samples are available, so that the biobank cannot be used to study cell-mediated immunity.  
28  
29 Researchers interested in studying cell-mediated immunity may want to contact BCQ19,  
30  
31 which routinely collects peripheral blood mononuclear cells [22]. Moreover, despite the  
32  
33 large sample, the plasma donor population is not fully representative of the overall Québec  
34  
35 population, as expected since plasma donors are typically more representative of the  
36  
37 healthy adult population. All exclusion criteria for plasma donations were also exclusion  
38  
39 criteria for the biobank, including immunodeficiencies, active infection, and recent cancer  
40  
41 among other chronic diseases. In addition, the database associated with our biobank does  
42  
43 not include information on disease severity, such as hospitalization or intensive care unit  
44  
45 admission, mortality, and comorbidities. Lastly, the database does not include information  
46  
47 on socioeconomic status, such as income and education. However, the six-digit zip code  
48  
49 can be used to generate a proxy index for socioeconomic status.  
50  
51  
52  
53  
54  
55  
56  
57  
58  
59  
60

## Collaboration

All researchers in Canada or elsewhere may apply to access the PlasCoV biobank. Researchers will be asked to fill a form with high-level information on their project's objectives, methods, novelty, and relevance to the biobank's objectives. They will also be asked to justify the sample size needed and any particular inclusion criteria, and to obtain ethics approval for their project.

## Data sharing statement

Details on the PlasCoV biobank and the application process can be obtained through Héma-Québec's website at <https://www.hema-quebec.qc.ca/coronavirus/hema-quebec-en-contexte-de-pandemie/etude-plascov.en.html>. Enquiries can be sent by e-mail to [BiobanqueCOVID@hema-quebec.qc.ca](mailto:BiobanqueCOVID@hema-quebec.qc.ca), or alternately to Dr. Marc Germain ([Marc.Germain@hema-quebec.qc.ca](mailto:Marc.Germain@hema-quebec.qc.ca)), the biobank director.

## Funding declaration

The project is entirely funded by the COVID-19 Immunity Task Force (CITF), which is supported by the Public Health Agency of Canada (PHAC). The views expressed herein do not necessarily reflect the views of the PHAC.

### **Contributorship statement**

MG, AL, RB and CR conceived and designed the study. AL, AB, JP, and YG collected the data. AL and YG analyzed the data, with input from MG, RB, MD and CR. MG, AL, YG and RB drafted the manuscript and MD, AB, CR and JP critically revised it for important intellectual content. All authors approved the final version to be published.

### **Ethics approval**

This study was approved by Héma-Québec Institutional review board. Individual informed consent was obtained from participants at the time of registration in the PlasCoV Biobank.

### **Acknowledgments**

Medical writing assistance was provided by Samuel Rochette, an employee of Héma-Québec.

### **Competing interest**

No competing interest.

## References

- 1 Cevik M, Grubaugh ND, Iwasaki A, *et al.* COVID-19 vaccines: Keeping pace with SARS-CoV-2 variants. *Cell* 2021;**184**:5077–81.
- 2 Hie B, Zhong ED, Berger B, *et al.* Learning the language of viral evolution and escape. *Science* 2021;**371**:284–8.
- 3 Héma-Québec. Phase 3 de l'étude sur la séroprévalence des anticorps dirigés contre le SRAS-CoV-2 au Québec.
- 4 Jones JM, Stone M, Sulaeman H, *et al.* Estimated US Infection- and Vaccine-Induced SARS-CoV-2 Seroprevalence Based on Blood Donations, July 2020-May 2021. *JAMA* 2021;**326**:1400–9. doi:10.1001/jama.2021.15161
- 5 Bolotin S, Tran V, Osman S, *et al.* SARS-CoV-2 seroprevalence survey estimates are affected by anti-nucleocapsid antibody decline. *J Infect Dis* 2021;**223**:1334–8.
- 6 Arora RK, Joseph A, Van Wyk J, *et al.* SeroTracker: a global SARS-CoV-2 seroprevalence dashboard. *Lancet Infect Dis* 2021;**21**:e75–6. doi:10.1016/S1473-3099(20)30631-9
- 7 Dan JM, Mateus J, Kato Y, *et al.* Immunological memory to SARS-CoV-2 assessed for up to 8 months after infection. *Science* 2021;**371**.
- 8 Doria-Rose N, Suthar MS, Makowski M, *et al.* Antibody persistence through 6 months after the second dose of mRNA-1273 vaccine for Covid-19. *N Engl J Med* 2021;**384**:2259–61.
- 9 Ebinger JE, Fert-Bober J, Printsev I, *et al.* Antibody responses to the BNT162b2 mRNA vaccine in individuals previously infected with SARS-CoV-2. *Nat Med* 2021;**27**:981–4.
- 10 Goel RR, Apostolidis SA, Painter MM, *et al.* Distinct antibody and memory B cell responses in SARS-CoV-2 naïve and recovered individuals after mRNA vaccination. *Sci Immunol* 2021;**6**:eabi6950.
- 11 Gudbjartsson DF, Norddahl GL, Melsted P, *et al.* Humoral immune response to SARS-CoV-2 in Iceland. *N Engl J Med* 2020;**383**:1724–34.
- 12 He Z, Ren L, Yang J, *et al.* Seroprevalence and humoral immune durability of anti-SARS-CoV-2 antibodies in Wuhan, China: a longitudinal, population-level, cross-sectional study. *The Lancet* 2021;**397**:1075–84.
- 13 Krammer F, Srivastava K, Alshammary H, *et al.* Antibody responses in seropositive persons after a single dose of SARS-CoV-2 mRNA vaccine. *N Engl J Med* 2021;**384**:1372–4.

- 1  
2  
3  
4  
5  
6  
7  
8  
9  
10  
11  
12  
13  
14  
15  
16  
17  
18  
19  
20  
21  
22  
23  
24  
25  
26  
27  
28  
29  
30  
31  
32  
33  
34  
35  
36  
37  
38  
39  
40  
41  
42  
43  
44  
45  
46  
47  
48  
49  
50  
51  
52  
53  
54  
55  
56  
57  
58  
59  
60
- 14 Levin EG, Lustig Y, Cohen C, *et al.* Waning immune humoral response to BNT162b2 Covid-19 vaccine over 6 months. *N Engl J Med* 2021;**385**:e84.
  - 15 Planas D, Veyer D, Baidaliuk A, *et al.* Reduced sensitivity of SARS-CoV-2 variant Delta to antibody neutralization. *Nature* 2021;**596**:276–80.
  - 16 Röltgen K, Powell AE, Wirz OF, *et al.* Defining the features and duration of antibody responses to SARS-CoV-2 infection associated with disease severity and outcome. *Sci Immunol* 2020;**5**.
  - 17 Wang H, Yuan Y, Xiao M, *et al.* Dynamics of the SARS-CoV-2 antibody response up to 10 months after infection. *Cell Mol Immunol* 2021;:1–3.
  - 18 Perreault J, Tremblay T, Fournier M-J, *et al.* Waning of SARS-CoV-2 RBD antibodies in longitudinal convalescent plasma samples within 4 months after symptom onset. *Blood* 2020;**136**:2588.
  - 19 Malsagova K, Kopylov A, Stepanov A, *et al.* Biobanks—A Platform for Scientific and Biomedical Research. *Diagnostics* 2020;**10**:485.
  - 20 Allen C, Joly Y, Moreno PG. Data sharing, biobanks and informed consent: a research paradox. *McGill JL Health* 2013;**7**:85.
  - 21 Caulfield T, Murdoch B. Genes, cells, and biobanks: Yes, there’s still a consent problem. *PLoS Biol* 2017;**15**:e2002654.
  - 22 Tremblay K, Rousseau S, Zawati MH, *et al.* The Biobanque québécoise de la COVID-19 (BQC19)—A cohort to prospectively study the clinical and biological determinants of COVID-19 clinical trajectories. *PloS One* 2021;**16**:e0245031.
  - 23 O’Brien SF, Lieshout-Krikke RW, Lewin A, *et al.* Research initiatives of blood services worldwide in response to the covid-19 pandemic. *Vox Sang* 2021;**116**:296–304.
  - 24 Institut national de santé publique du Québec. Données de vaccination contre la COVID-19 au Québec. 2021. <https://www.inspq.qc.ca/covid-19/donnees/vaccination> (accessed 17 Nov 2021).
  - 25 Tazuin A, Gong SY, Beaudoin-Bussièrès G, *et al.* Strong humoral immune responses against SARS-CoV-2 Spike after BNT162b2 mRNA vaccination with a 16-week interval between doses. *Cell Host Microbe* 2021.
  - 26 Whitcombe AL, McGregor R, Craigie A, *et al.* Comprehensive analysis of SARS-CoV-2 antibody dynamics in New Zealand. *Clin Transl Immunol* 2021;**10**. doi:10.1002/cti2.1261

- 1  
2  
3 27 Ripperger TJ, Uhrlaub JL, Watanabe M, *et al.* Orthogonal SARS-CoV-2 serological  
4 assays enable surveillance of low-prevalence communities and reveal durable humoral  
5 immunity. *Immunity* 2020;**53**:925-933. e4.  
6  
7  
8 28 Cohen KW, Linderman SI, Moodie Z, *et al.* Longitudinal analysis shows durable and  
9 broad immune memory after SARS-CoV-2 infection with persisting antibody  
10 responses and memory B and T cells. *Cell Rep Med* 2021;**2**:100354.  
11 doi:10.1016/j.xcrm.2021.100354  
12  
13 29 Bégin P, Callum J, Heddle NM, *et al.* Convalescent plasma for adults with acute  
14 COVID-19 respiratory illness (CONCOR-1): study protocol for an international,  
15 multicentre, randomized, open-label trial. *Trials* 2021;**22**:1–17.  
16  
17  
18  
19  
20  
21  
22  
23  
24  
25  
26  
27  
28  
29  
30  
31  
32  
33  
34  
35  
36  
37  
38  
39  
40  
41  
42  
43  
44  
45  
46  
47  
48  
49  
50  
51  
52  
53  
54  
55  
56  
57  
58  
59  
60



1  
2  
3 **Figure caption**  
4  
5

6 **Figure 1.** Average number of days between donations as a function of the number of  
7 donations in PlasCoV.  
8  
9

10  
11  
12  
13  
14  
15  
16  
17  
18  
19  
20  
21  
22  
23  
24  
25  
26  
27  
28  
29  
30  
31  
32  
33  
34  
35  
36  
37  
38  
39  
40  
41  
42  
43  
44  
45  
46  
47  
48  
49  
50  
51  
52  
53  
54  
55  
56  
57  
58  
59  
60

For peer review only

1  
2  
3  
4  
5  
6  
7  
8  
9  
10  
11  
12  
13  
14  
15  
16  
17  
18  
19  
20  
21  
22  
23  
24  
25  
26  
27  
28  
29  
30  
31  
32  
33  
34  
35  
36  
37  
38  
39



For peer review only

|                       |              |              |              |            |            |            |            |            |            |            |            |            |            |              |
|-----------------------|--------------|--------------|--------------|------------|------------|------------|------------|------------|------------|------------|------------|------------|------------|--------------|
| <b>Donors (N)</b>     | <b>2,498</b> | <b>1,505</b> | <b>1,045</b> | <b>758</b> | <b>567</b> | <b>441</b> | <b>344</b> | <b>355</b> | <b>274</b> | <b>209</b> | <b>177</b> | <b>187</b> | <b>165</b> | <b>1,631</b> |
| <b>Proportion (%)</b> | <b>16.1</b>  | <b>9.7</b>   | <b>6.7</b>   | <b>4.9</b> | <b>3.7</b> | <b>2.8</b> | <b>2.2</b> | <b>2.3</b> | <b>1.8</b> | <b>1.3</b> | <b>1.1</b> | <b>1.2</b> | <b>1.1</b> | <b>10.5</b>  |
